1 **Site-specific lipidation enhances IFITM3 membrane interactions and**  
2 **antiviral activity**

3  
4  
5 Emma Garst<sup>1,2†</sup>, Hwayoung Lee<sup>3†</sup>, Tandrila Das<sup>1,2†</sup>, Shibani Bhattacharya<sup>4</sup>, Avital Percher<sup>1</sup>,  
6 Rafal Wiewiora<sup>2,5</sup>, Isaac P. Witte<sup>1</sup>, Yumeng Li<sup>6</sup>, Michael Goger<sup>4</sup>, Tao Peng<sup>6</sup>, Wonpil Im<sup>3</sup>, Howard  
7 C. Hang<sup>1,7\*</sup>  
8

9 <sup>1</sup>Laboratory of Chemical Biology and Microbial Pathogenesis, The Rockefeller University, New  
10 York, New York 10065, United States.

11  
12 <sup>2</sup>Tri-Institutional Ph.D. Program in Chemical Biology, New York, NY 10065, United States.

13  
14 <sup>3</sup>Department of Biological Sciences, Chemistry, and Bioengineering, Lehigh University,  
15 Bethlehem, PA 18015, United States.

16  
17 <sup>4</sup>New York Structural Biology Center, New York, NY 10027, United States.

18  
19 <sup>5</sup>Memorial Sloan Kettering Cancer Center, New York, NY 10065, United States.

20  
21 <sup>6</sup>State Key Laboratory of Chemical Oncogenomics, School of Chemical Biology and  
22 Biotechnology, Peking University Shenzhen Graduate School, Shenzhen 518055, China.

23  
24 <sup>7</sup>Departments of Immunology and Microbiology and Chemistry, Scripps Research, La Jolla, CA  
25 92037, United States.

26  
27 †These authors contributed equally.

28  
29 \*Correspondence: [hhang@scripps.edu](mailto:hhang@scripps.edu)  
30  
31

## 1 ABSTRACT

2 Interferon-induced transmembrane proteins (IFITMs) are S-palmitoylated proteins in  
3 vertebrates that restrict a diverse range of viruses. S-palmitoylated IFITM3 in particular  
4 directly engages incoming virus particles, prevents their cytoplasmic entry, and  
5 accelerates their lysosomal clearance by host cells. However, the precise molecular  
6 mechanisms of action for IFITM-mediated viral restriction are still unclear. To investigate  
7 how site-specific S-palmitoylation controls IFITM3 antiviral activity, here we employed  
8 computational, chemical, and biophysical approaches to demonstrate that site-specific  
9 lipidation of IFITM3 at highly conserved cysteine 72 modulates its conformation and  
10 interaction with lipid membranes leading to enhanced antiviral activity of IFITM3 in  
11 mammalian cells. Collectively, our results demonstrate that site-specific S-palmitoylation  
12 of IFITM3 directly alters its biophysical properties and activity in cells to prevent virus  
13 infection.

14

## 15 INTRODUCTION

16 Interferon-induced transmembrane proteins (IFITMs) are S-palmitoylated proteins  
17 implicated in the immune response to viral infections (**Figure 1**). IFITMs were identified  
18 as interferon (IFN)-induced genes more than 30 years ago (Friedman, Manly,  
19 McMahon, Kerr, & Stark, 1984), but the broad antiviral activity of IFITM1, IFITM2, and  
20 IFITM3 was discovered more recently from siRNA knockdown (Brass et al., 2009) and  
21 overexpression screens (Schoggins et al., 2011). IFITM3 is the most active isoform and  
22 restricts many human pathogens entering through the endocytic pathway including  
23 influenza A virus (IAV) (Everitt et al., 2012), dengue virus (DENV) (Brass et al., 2009;  
24 John et al., 2013), Ebola virus (EBOV) (Brass et al., 2009; I.-C. Huang et al., 2011),  
25 Zika virus (Savidis et al., 2016), and other virus infections in cell culture (Bailey, Zhong,  
26 Huang, & Farzan, 2014; Perreira, Chin, Feeley, & Brass, 2013). IFITM3 is up-regulated  
27 by interferon stimulation in many cell types including cardiac fibroblasts (Kenney et al.,  
28 2019) and dendritic cells (Infusini et al., 2015), but is also constitutively expressed in  
29 most cell types, including the lung epithelium (X. Sun et al., 2016), embryonic stem cells  
30 (Xianfang Wu et al., 2018), and some tissue resident T cells (Wakim, Gupta, Mintern, &  
31 Villadangos, 2013; Wakim et al., 2012). Thus, IFITM3 provides both intrinsic and  
32 inducible protection against a variety of viral pathogens in many tissues. Beyond cell-  
33 intrinsic immunity, IFITMs have also been suggested to modulate adaptive immune  
34 responses through protection of immune effector cells from viral infection (Wakim et al.,  
35 2013) and by regulating CD4<sup>+</sup> T-cell differentiation (Yáñez et al., 2018). IFITMs reduce  
36 the susceptibility of trophoblasts to viral infection in the placenta while preventing  
37 trophoblast cell-cell fusion mediated by the ancestral retrovirus-derived syncytin protein,  
38 an essential process for fetal development (Buchrieser et al., 2019; Zani et al., 2019).  
39 Notably, infection of *Ifitm3*<sup>-/-</sup> mice with H3N2 IAV and pandemic H1N1 IAV led to  
40 increased morbidity and mortality (Bailey, Huang, Kam, & Farzan, 2012; Everitt et al.,  
41 2012; Kenney et al., 2019). IFITMs have also been shown to be expressed in other  
42 vertebrates and implicated in their resistance to viral infections (Bailey et al., 2014;  
43 Benfield et al., 2020; Compton et al., 2016). IFITMs are therefore clearly important for  
44 host susceptibility to diverse virus infections, which warrants further investigation into  
45 the mechanistic underpinnings of their antiviral activity.

46

1 In humans, a naturally occurring single nucleotide polymorphism (SNP rs12252)  
2 proposed to express an N-terminal truncated isoform of IFITM3 has been correlated  
3 with severe influenza in hospitalized populations (Everitt et al., 2012; Y.-H. Zhang et al.,  
4 2013); however, transcription of this isoform has not been detected by RNA sequencing  
5 of patient samples (Makvandi-Nejad et al., 2017; Randolph et al., 2017). Another loss-  
6 of-function allele has been identified in the IFITM3 gene 5' untranslated region (SNP  
7 rs34481144), and is associated with lower IFITM3 mRNA expression and a decrease in  
8 airway resident CD8<sup>+</sup> T cells during viral infection (Allen et al., 2017). Significantly, a  
9 recent small human cohort study showed that the rs12252 SNP was also associated  
10 with a higher incidence of severe COVID-19 (Y. Zhang et al., 2020b). Previously,  
11 overexpression of IFITM3 was shown to inhibit SARS-CoV infections (I.-C. Huang et al.,  
12 2011), but surprisingly promoted the infection of lung epithelial cells by the endemic  
13 human coronavirus OC43 (Zhao et al., 2014; 2018). Early studies on the role of the  
14 IFITMs in SARS-CoV-2 infection have been inconclusive. In initial screening and  
15 overexpression studies, IFITM2 and IFITM3 were found to inhibit SARS-CoV-2  
16 pseudotyped virus (X. Zhang et al., 2020a), and IFITMs were shown to inhibit SARS-  
17 CoV-2 spike protein mediated cell-cell fusion (Buchrieser et al., 2020). However,  
18 conflicting studies have observed that SARS-CoV-2 pseudotyped virus infection (Zheng  
19 et al., 2020) or spike protein mediated cell-cell fusion (Zang et al., 2020) are not  
20 inhibited by IFITM3. More recent studies with genuine SARS-CoV-2 point to a more  
21 nuanced role in viral restriction. In these studies, IFITM overexpression was shown to  
22 restrict SARS-CoV-2 infection, though expression of an IFITM3 endocytosis mutant that  
23 accumulates at the plasma membrane enhanced SARS-CoV-2 infection (Shi et al.,  
24 2020). These results suggest that IFITM3 may have opposing effects on SARS-CoV-2  
25 depending on the cellular location at which the virus fusion process occurs.  
26 Interestingly, IFITMs may have a proviral effect on SARS-CoV-2 infection of lung  
27 epithelial cells (Prelli Bozzo et al., 2020), which are infected primarily via plasma  
28 membrane fusion as opposed to endosomal fusion (Hoffmann, Kleine-Weber, et al.,  
29 2020a; Hoffmann, Mösbauer, et al., 2020b). As this potentially proviral effect is unique  
30 to coronaviruses, a mechanistic understanding of the activity of IFITMs will be key in  
31 delineating their roles in coronavirus infections.

32  
33 Cellular studies of IFITMs have begun to reveal key features of their antiviral activity.  
34 Immunofluorescence (Chesarino, McMichael, & Yount, 2014a; Perreira et al., 2013) and  
35 live cell imaging (Peng & Hang, 2016) have shown that IFITM3 is largely localized to  
36 endolysosomal vesicles in mammalian cells, where it restricts viruses that enter the cell  
37 through the endocytic pathway (Desai et al., 2014). Live cell imaging studies during  
38 virus entry by our laboratory (Spence et al., 2019) and others (Suddala et al., 2019)  
39 revealed that IFITM3 directly engages incoming virus-containing vesicles and  
40 accelerated their trafficking to lysosomes for destruction. Lipid mixing assays showed  
41 that IFITM3 does not prevent viral hemifusion with host membranes (Desai et al., 2014),  
42 suggesting that IFITMs may inhibit virus pore formation. Although the antiviral  
43 mechanism of IFITM3 is still unclear, two non-exclusive models for the restriction of viral  
44 particles have emerged (**Figure 1**). IFITM3 could actively accelerate the degradation of  
45 viral particles by manipulation of cellular trafficking pathways, as observed by live cell  
46 imaging studies (Spence et al., 2019). Alternatively, IFITM3 may physically restrict the

1 virus infection by altering the biophysical properties of host membranes. This is  
2 supported by recent studies indicating that IFITM3 can increase the order and rigidity of  
3 endosomal membranes as well as induce negative curvature that could potentially  
4 stabilize a hemifused state while inhibiting viral pore formation (Guo et al., 2020;  
5 Rahman et al., 2020). Both of these mechanisms may account for the observed antiviral  
6 activity and cellular features of IFITM-expressing cells, including the enlargement and  
7 accumulation of cholesterol in endocytic vesicles (Amini-Bavil-Olyaei et al., 2013; Desai  
8 et al., 2014). Additional cellular and biophysical studies of IFITMs and their regulatory  
9 mechanisms are therefore still needed to understand their mechanisms of action.  
10

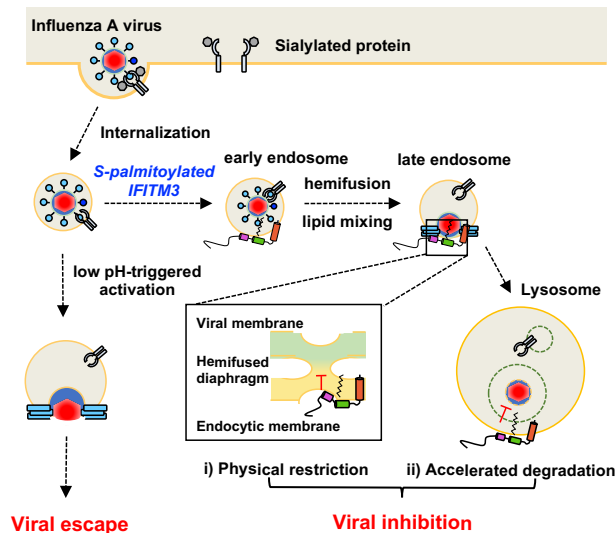

11  
12 **Figure 1. S-palmitoylation is essential for the antiviral activity of IFITM3.** S-palmitoylated IFITM3  
13 restricts viral entry through the endocytic pathway. In brief, a virus can enter the cell by binding a surface  
14 receptor and being internalized through the endocytic pathway. Without the presence of IFITM3, the virus  
15 can fuse with the endocytic membrane, releasing its contents into the cytoplasm for replication. When  
16 IFITM3 is S-palmitoylated at Cys72, it colocalizes with virus-containing endosomes in the early endocytic  
17 pathway and prevents the release of the virus into the cytoplasm (Spence et al., 2019; Suddala et al.,  
18 2019). Two non-exclusive models have been proposed for this activity: *i*) IFITM3 physically restricts the  
19 virus in the endocytic compartment preventing membrane fusion, perhaps by stabilizing a hemifused  
20 membrane intermediate, or *ii*) IFITM3 prevents the egress of the virus from the endocytic pathway by  
21 rapidly shuttling the endosome and its cargo for lysosomal degradation.

22 The following figure supplement is available for figure 1:

23 **Figure supplement 1.** Structure and lipidation of IFITM3.  
24  
25

26 IFITMs were originally proposed to be dual-pass transmembrane proteins (Brass et al.,  
27 2009), but epitope mapping studies in mammalian cells (Bailey, Kondur, Huang, &  
28 Farzan, 2013; Weston et al., 2014; Yount, Karssemeijer, & Hang, 2012) and *in vitro*  
29 electron paramagnetic resonance (EPR) spectroscopy and nuclear magnetic resonance  
30 (NMR) spectroscopy studies (Ling et al., 2016) have indicated that IFITM3 is a type IV  
31 single-pass transmembrane protein with an amphipathic region from residue Trp60 to  
32 Arg85 containing two  $\alpha$ -helices (**Figure 1 – figure supplement 1**). This region is  
33 contained within the conserved CD225 domain, which also includes an intrahelical loop  
34 from residue Arg85 to Lys104 (El-Gebali et al., 2018). Through alanine scanning

1 mutagenesis, a number of point mutations within these regions at post-translational  
2 modification (PTM) sites or within putative oligomerization motifs were found to disrupt  
3 the antiviral activity of IFITM3 (John et al., 2013). Moreover, mutations within the first  
4 amphipathic helix (Val59-Met68) that altered IFITM3 hydrophilicity abrogated the  
5 antiviral activity, indicating that the amphipathic nature of this helix is required for its  
6 antiviral function (Chesarino et al., 2017). Furthermore, amphipathic helix 1 can alter the  
7 biophysical characteristics of the phospholipid bilayer by inducing negative curvature,  
8 increasing lipid order, and increasing membrane stiffness (Guo et al., 2020). These  
9 studies confirm that the conserved amphipathic region of IFITM3 is necessary for the  
10 restriction of viral particles in the endocytic pathway, possibly through the direct  
11 manipulation of the local membrane environment.

12  
13 IFITM3 activity is regulated by a number of PTMs such as S-palmitoylation (Cys71,  
14 Cys72, and Cys105), ubiquitination (Lys24, Lys83, Lys88, and Lys104), phosphorylation  
15 (Tyr20), and methylation (Lys88) (Chesarino et al., 2014a). The interplay between these  
16 PTMs has been implicated in the localization, activity, and turnover of IFITM3.  
17 Methylation and ubiquitination at Lys88 can both down-regulate IFITM3 activity (Yount  
18 et al., 2012), whereas phosphorylation at Tyr20 can block IFITM3 endocytosis and  
19 ubiquitination (Chesarino, McMichael, Hach, & Yount, 2014b). Ubiquitination at Lys24  
20 promotes the interaction of IFITM3 and VCP/p97, which regulates IFITM3 trafficking and  
21 turnover (Xiaojun Wu et al., 2020). Several studies from our laboratory have  
22 demonstrated IFITM3 can be S-palmitoylated at Cys71, Cys72, and Cys105 (Percher et  
23 al., 2016; Yount et al., 2012; 2010). In particular, Cys72 is highly conserved across most  
24 mammals and is required for the antiviral activity of IFITM3 orthologs from mice, bats,  
25 and humans (Benfield et al., 2020; John et al., 2013; Percher et al., 2016). Site-directed  
26 mutagenesis and live cell imaging studies by our laboratory and others have shown that  
27 residue Cys72 is essential for IFITM3 antiviral activity, trafficking, and colocalization with  
28 incoming viral particles in the endocytic pathway (Spence et al., 2019; Suddala et al.,  
29 2019). Moreover, overexpression of S-palmitoyltransferases (zDHHC-PATs 3, 7, 15,  
30 and 20) led to increased IFITM3 S-palmitoylation and antiviral activity (McMichael et al.,  
31 2017). These studies demonstrate that site-specific and regulated S-palmitoylation of  
32 IFITMs is particularly crucial for their antiviral activity, but these studies were primarily  
33 from loss-of-function phenotypes and did not demonstrate if site-specific lipidation  
34 confers gain-of-function.

35  
36 S-Palmitoylation is a reversible PTM in eukaryotes. S-Palmitoylation targets peripheral  
37 membrane proteins to specific cellular membranes (Rocks et al., 2010) and can act as a  
38 sorting mechanism in cells without specific receptor-ligand pairing (Rocks et al., 2005).  
39 For transmembrane proteins, S-palmitoylation can promote or disrupt association with  
40 specific membrane microdomains (Abrami, Leppla, & van der Goot, 2006; Levental,  
41 Lingwood, Grzybek, Coskun, & Simons, 2010; Yang et al., 2004), stabilize or disrupt  
42 protein-protein interactions (Lakkaraju et al., 2012; Yang et al., 2004; Zevian,  
43 Winterwood, & Stipp, 2011), and change the conformation of proteins (Abrami, Kunz,  
44 Iacovache, & van der Goot, 2008). Although significant advances have been made to  
45 detect and discover S-palmitoylated proteins (Hannoush & Sun, 2010; Yount et al.,  
46 2010), the functional analysis of site-specific S-palmitoylation, which may be sub-

1 stoichiometric in cells, is still challenging. To investigate how S-palmitoylation enhances  
2 the antiviral activity of IFITMs, we employed *in silico* as well as chemical strategies to  
3 evaluate site-specifically lipidated IFITM3 structure *in vitro* and antiviral activity in  
4 mammalian cells. Our molecular dynamics simulation studies, the reconstitution of  
5 chemically lipidated IFITM3 *in vitro* (**Figure 1 – figure supplement 1**), and solution-  
6 state NMR spectroscopy analysis suggest that site-specific S-palmitoylation of IFITM3  
7 at Cys72 induces conformational changes in the amphipathic helices and N-terminal  
8 domain, and anchor these cytoplasmic domains to cellular membranes. To complement  
9 these *in silico* and *in vitro* structural studies, we used genetic code expansion and  
10 bioorthogonal ligation methods with tetrazine-lipid analogs that our laboratories recently  
11 developed (**Li Y et al in review, Supplemental File**) for site-specific lipidation of  
12 IFITM3 in mammalian cells (**Figure 1 – figure supplement 1**). These studies showed  
13 that site-specific chemical lipidation enhanced IFITM3 antiviral activity in mammalian  
14 cells, providing additional support for our modeling and structural studies *in vitro*.  
15 Collectively, our studies highlight the importance of site-specific lipidation methods to  
16 investigate gain-of-function phenotypes for S-palmitoylation and underscores the  
17 significance of this PTM for the antiviral activity and biochemical properties of IFITMs.

18

19

## 20 **RESULTS**

21 **Molecular dynamics simulation of S-palmitoylated IFITM3 and chemically**  
22 **lipidated variants.** To understand how site-specific S-palmitoylation controls the  
23 interaction of IFITM3 with the membrane bilayer, we used molecular dynamics to  
24 simulate IFITM3 in a variety of lipidation states. For these studies, human IFITM3 was  
25 modeled in a 1,2-dimyristoyl-*sn*-glycero-3-phosphocholine (DMPC) bilayer without  
26 palmitoylation (apo), with a palmitoyl group at Cys72 (Cys72-Palm), or with a stable  
27 maleimide-palmitoylation mimic (Cys72-mPalm) (**Figure 2A**). We found that S-  
28 palmitoylation at Cys72 altered the positioning of the amphipathic region of IFITM3,  
29 particularly within the first amphipathic helix (AH1, Leu62-Phe67) (**Figure 2A**). To  
30 quantify and compare the effects of palmitoylation, we calculated the distance of the  
31 center of mass of each helix from the membrane center (at  $Z = 0$ ) throughout the 1- $\mu$ s  
32 simulation (**Figure 2B**). When unmodified, AH1 remained water exposed with an  
33 average distance of 26.5 Å away from the membrane center. Conversely, Cys72  
34 palmitoylation led to increased membrane proximity in AH1, reducing its average  
35 distance from the membrane center to 16.1 Å near the membrane head group. The  
36 Cys72-mPalm modification also brought AH1 into close proximity with the membrane  
37 bilayer, showing an average distance of 9.1 Å (below the head group). Although similar  
38 in effect, the closer association of the mPalm-modified construct suggests that the  
39 maleimide head group of the palmitoyl mimic may either be able to insert AH1 better  
40 into the membrane bilayer or form stronger interactions with the phospholipids  
41 compared to the thioester of natural S-palmitoylation. Interestingly, AH2 in all models  
42 showed similar orientation and positioning regardless of Cys72 palmitoylation despite its  
43 proximity to the lipid modification. Thus, S-palmitoylation may lead to localized and  
44 specific changes in protein structure and dynamics.

45

1 In addition to AH1 membrane association, we also measured the helical tilt of the  $\alpha$ -  
2 helical segments (with respect to the membrane normal) throughout the simulations.  
3 These data show that when IFITM3 is not palmitoylated, AH1 is a flexible segment that  
4 can sample many orientations (**Figure 2C**). Additionally, during the simulation, the AH1  
5 region frequently contacted water molecules, while only occasionally contacting the  
6 phospholipid head groups, as might be expected of a soluble peptide rather than one  
7 with amphipathic tendencies (**Figure 2D**). In contrast, when IFITM3 is modified at  
8 Cys72 either with a naturally occurring palmitoyl group or maleimide-palmitate, the AH1  
9 is restricted to the surface of the model membrane, sampling a tight range of helical tilts  
10 around  $90^\circ$  from the membrane normal and interacting with water, the phospholipid  
11 head groups, and the lipid tails in relatively equal parts (**Figure 2C, D**). In the case of  
12 loop 2 (residue 86 to 97), the apo model interacts much more frequently with the  
13 phospholipid head groups compared to the lipidated models (Cys72-Palm and Cys72-  
14 mPalm), indicating the effect of lipidation on IFITM3 dynamics can be seen on both the  
15 N- and C-terminal side of the modification up to 20 residues away (**Figure 2D**). No  
16 notable difference was observed in the interactions between the transmembrane  
17 domain and its surrounding environments throughout all systems. Together, these data  
18 indicate that lipidation at Cys72 may be required for the proper folding and anchoring of  
19 IFITM3 AH1 despite its relative distance from AH1, and more significantly its location  
20 past a short disordered region. Moreover, this molecular simulation indicates that  
21 maleimide-palmitate can function as a reasonable mimic of S-palmitoylation for our  
22 structural and biochemical studies.

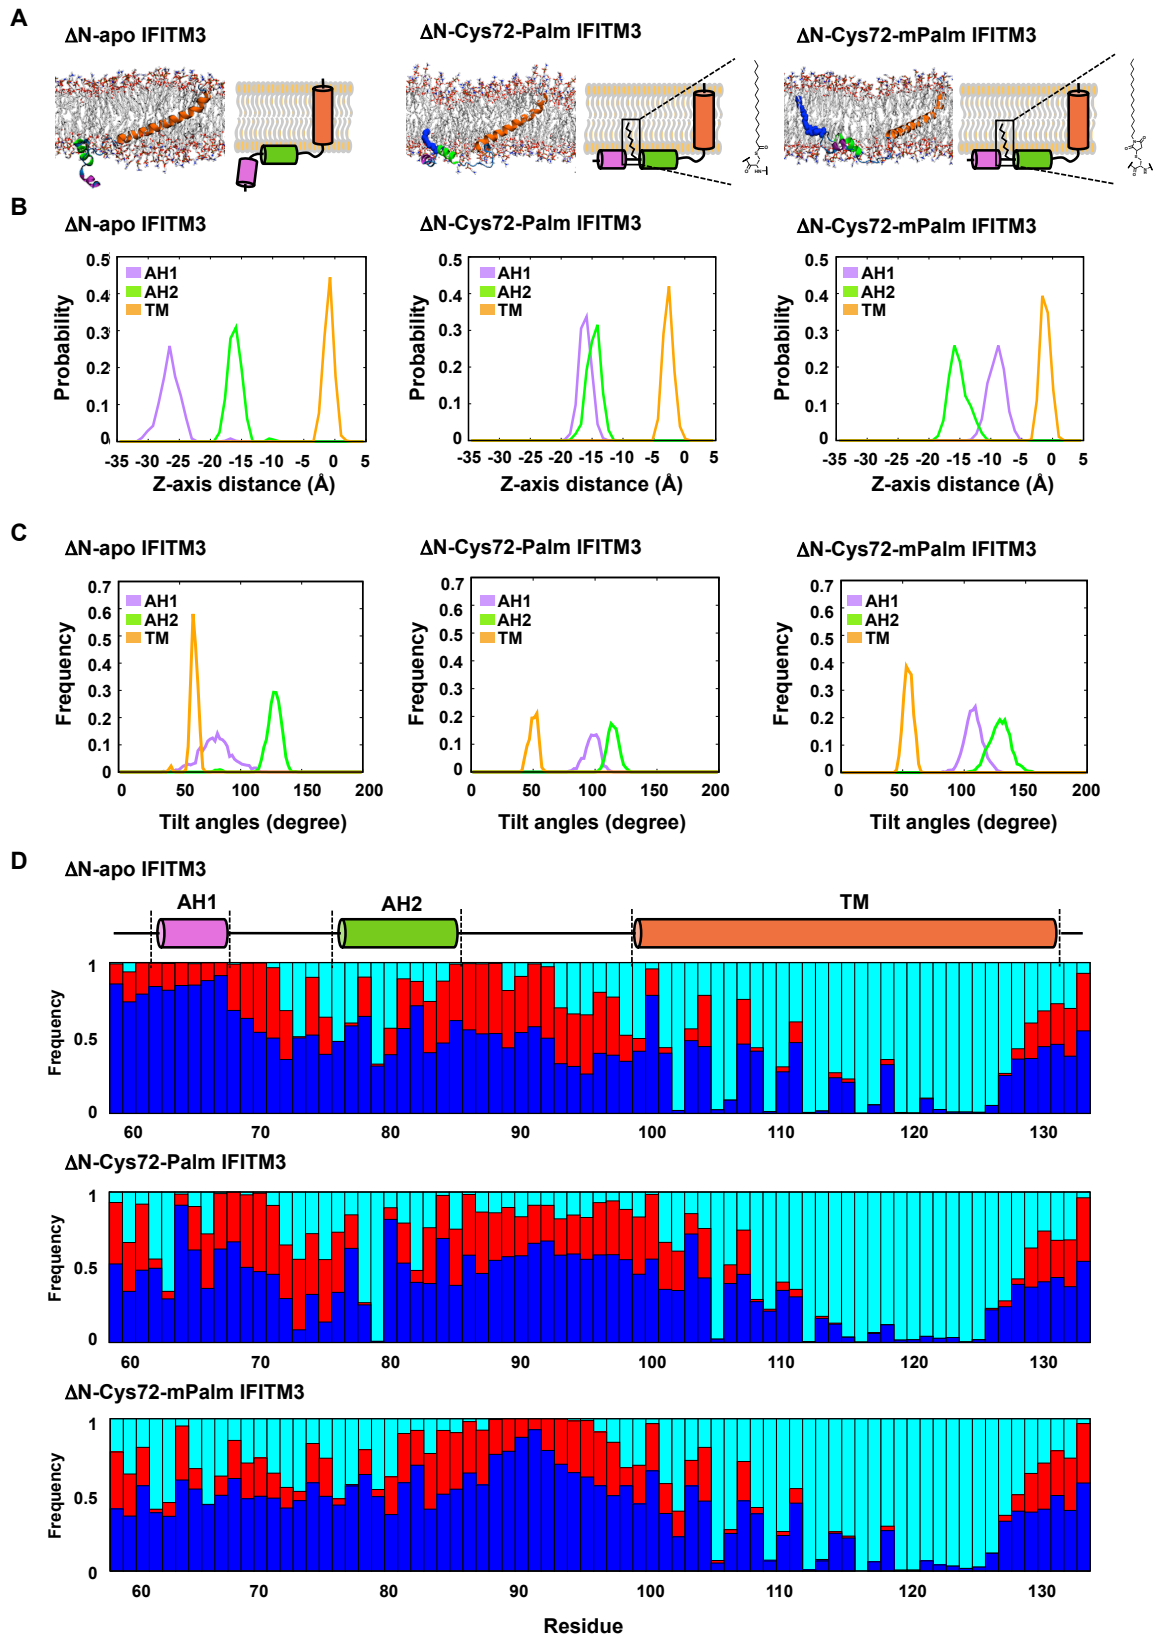



1 **Figure 2. Molecular dynamics simulation of site-specifically lipidated IFITM3.** A) Modeling snapshots  
2 of apo, Cys72-S-palmitoylated (Cys72-Palm), and Cys72-maleimide-palmitate (Cys72-mPalm) modified  
3 IFITM3 from residue Val58 to Gly133 (denoted as  $\Delta N$  in figure) in DMPC bilayers are shown side by side  
4 with representative cartoons. The initial secondary structure was modeled based on published structural  
5 data (Ling et al., 2016), with amphipathic helix 1 from residue Leu62 to Phe67 (AH1, magenta),  
6 amphipathic helix 2 from residue Phe78 to Ser84 (AH2, green), and a 33 amino acid transmembrane  
7 domain from residue Ala98 to Ala131 (TM, orange). Molecular dynamics simulations were performed on  
8 these conditions for 1  $\mu$ s, of which the last 500 ns were used for analysis. The simulations were run in  
9 triplicate for better sampling. B) The distance of the center of mass for each helix from the membrane  
10 center ( $Z = 0$ ) was measured throughout the course of the simulation. Probability plots of the AH1, AH2,  
11 and TM domain position relative to the membrane center for the different IFITM3 variants are shown. The  
12 center of mass distance of AH1 is represented by magenta, AH2 by green, and the TM helix is  
13 represented by orange. C) The frequency with which IFITM3 AH1, AH2, and TM helix sample a specific  
14 helical tilt in regard to the membrane normal (the Z axis) was measured throughout the course of a 1- $\mu$ s  
15 simulation. The helical tilt frequency of AH1 is represented by magenta, AH2 by green, and the TM helix  
16 is represented by orange. D) The frequency with which each residue of apo IFITM3, Cys72-Palm IFITM3,  
17 and Cys72-mPalm IFITM3 interacted with different environments throughout the course of the molecular  
18 dynamics simulation was measured. The interaction pattern graph shows the probability of occurrence  
19 within 4 Å from water (blue), DMPC lipid head (red), or DMPC lipid tail (cyan).

20  
21  
22 **Generation of recombinant site-specifically lipidated IFITM3.** To further understand  
23 how site-specific lipidation regulates IFITM3, we optimized the expression and  
24 purification of recombinant human His<sub>6</sub>-tagged IFITM3 from *E. coli* and employed  
25 maleimide-palmitate (mPalm) for site-specific lipidation of key Cys residues (**Figure**  
26 **3A**). Maleimide-palmitate was used due to its cysteine specific reactivity and potential  
27 for full length protein labeling in detergents. In order to optimize the maleimide coupling  
28 reaction, we tested a number of conditions including time, temperature, maleimide-  
29 palmitate concentration, and buffer composition, and monitored protein labeling by  
30 mass shift on an SDS-PAGE gel (**Figure 3 – figure supplement 1**). Through these  
31 studies, we found that the maleimide coupling reaction went to completion in 2 hours at  
32 15°C, with a final maleimide-palmitate concentration of 0.5 mM in 10% DMSO. The  
33 reaction could be effectively blocked or quenched with excess *N*-ethyl maleimide or  $\beta$ -  
34 mercaptoethanol, respectively, indicating that the modification is specific to free  
35 cysteines (**Figure 3 – figure supplement 2**). Using this approach, we utilized Cys to  
36 Ala mutagenesis to generate a panel of site-specifically lipidated His<sub>6</sub>-IFITM3 constructs  
37 modified at Cys72, Cys105, and dually at Cys72 and Cys105. The maleimide coupling  
38 reaction was specific and went to completion, as shown through SDS-PAGE gel shift  
39 and MALDI analysis (**Figure 3B, C**). Comparison between His<sub>6</sub>-apo IFITM3 and His<sub>6</sub>-  
40 Cys72-mPalm IFITM3 reveals a mass difference of 362 Da, indicating the addition of  
41 one maleimide-palmitate group (**Figure 3C** and **Figure 3 – figure supplement 3**). The  
42 dually modified His<sub>6</sub>-Cys72Cys105-mPalm had a mass increase of 710 Da, consistent  
43 with the addition of two maleimide-palmitate groups (**Figure 3C** and **Figure 3 – figure**  
44 **supplement 3**). Together, these data show that IFITM3 can be effectively modified with  
45 the *S*-palmitoylation analog maleimide-palmitate at free cysteines under mild aqueous  
46 conditions.

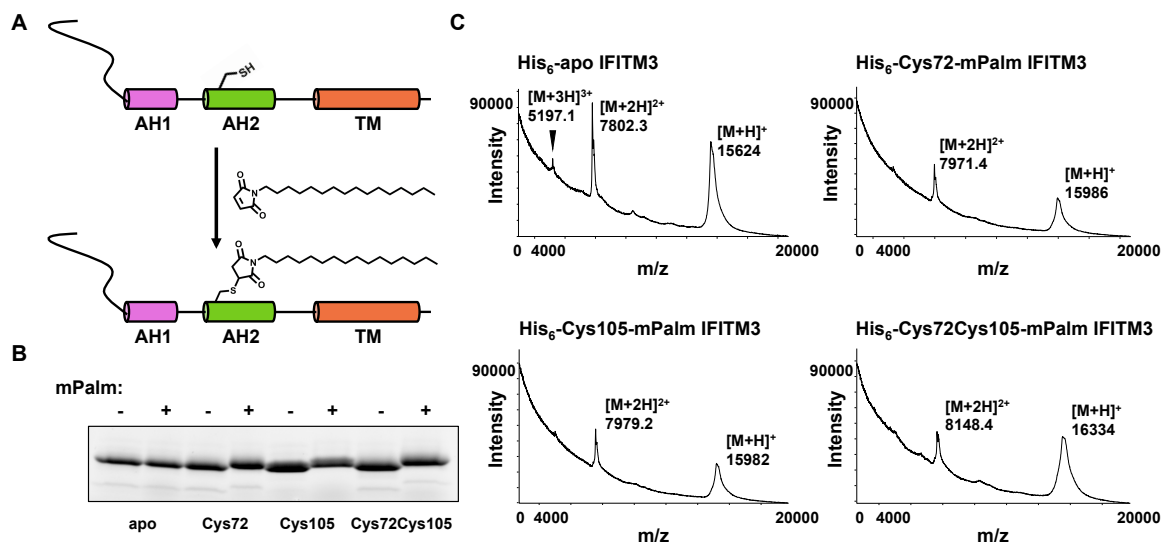

1  
2 **Figure 3. Generation and characterization of site-specifically lipidated IFITM3 *in vitro*.** A)  
3 Schematic for the production of site-specifically lipidated IFITM3 via a maleimide coupling reaction specific  
4 for reduced cysteine residues. B) The successful coupling of maleimide-palmitate (mPalm) to IFITM3 at  
5 free cysteines was measured by an SDS-PAGE gel shift. The reaction went to completion in 2 hours at  
6 15°C under mild reducing conditions (25mM HEPES pH 7.4, 150 mM KCl, 0.8% TX-100, 1mM TCEP, 0.5  
7 mM maleimide-palmitate, 10% DMSO). C) MALDI spectra of apo and site-specifically mPalm-modified  
8 IFITM3 were collected in linear, delayed extraction mode with a delay of 0.75-1 μs and sampling rate of 2  
9 ns. Each spectrum corresponds to approximately 1000 scans. Samples were calibrated internally with a  
10 horse myoglobin protein standard.

11 The following figure supplements are available for figure 3:

12 **Figure supplement 1.** Optimization of Cys72-IFITM3 maleimide-palmitate coupling reaction.

13 **Figure supplement 2.** Maleimide-palmitate coupling with Cys72-IFITM3 can be blocked or quenched by  
14 *N*-ethyl maleimide (NEM) or β-mercaptoethanol (BME) respectively.

15 **Figure supplement 3.** MALDI quantification of His<sub>6</sub>-apo IFITM3 and panel of His<sub>6</sub>-IFITM3 lipidated  
16 variants.

17  
18  
19 **Solution state NMR analysis of chemically lipidated IFITM3.** To determine the effect  
20 of lipidation on the structure of His<sub>6</sub>-IFITM3, we expressed and purified isotopically  
21 labeled unmodified (apo) His<sub>6</sub>-IFITM3 and Cys72 monolipidated (Cys72-mPalm) His<sub>6</sub>-  
22 IFITM3 in dodecyl phosphocholine (DPC) micelles at pH7 for structural characterization  
23 by solution-state NMR (**Figure 4A**). In brief, isotopically labeled (<sup>2</sup>H/<sup>13</sup>C/<sup>15</sup>N) His<sub>6</sub>-apo  
24 and His<sub>6</sub>-Cys72-mPalm IFITM3 were purified and dialyzed into NMR buffer (25mM  
25 HEPES pH7, 150mM KCl, 0.5% DPC) for backbone assignments. A suite of <sup>15</sup>N-  
26 traverse relaxation optimized spectroscopy (TROSY) based triple resonance  
27 experiments (<sup>15</sup>N-HSQC, HNCA, HNCOC, HNCACB, HNCOCA, HNCOCACB, and  
28 HNCACO) were used to assign the backbone resonances. Sequential assignments  
29 were facilitated by <sup>15</sup>N specific labeling of specific residues (Ala, Leu, Val, Ile, and Phe)  
30 to alleviate resonance overlap and allow the assignment of residues proximal to the site  
31 of lipidation (**Figure 4B** and **Figure 4 – figure supplement 1**). In total, we were able to  
32 assign 70% and 75% of the His<sub>6</sub>-Cys72-mPalm and His<sub>6</sub>-apo IFITM3 protein backbones  
33 respectively (**Figure 4 – figure supplement 2** and **Figure 4 – figure supplement 3**).  
34 The backbone chemical shifts were analyzed in TALOS+ (Shen, Delaglio, Cornilescu, &

1 Bax, 2009) to determine the secondary structure of His<sub>6</sub>-IFITM3, which was highly  $\alpha$ -  
2 helical in the C-terminal domain (residue Ser61 to Gly133) (**Figure 4C**). In the N-  
3 terminal region, both His<sub>6</sub>-apo and His<sub>6</sub>-Cys72-mPalm IFITM3 had a high percentage of  
4 dynamic residues (26.7% and 35%, respectively). The random coil index (RCI)  
5 predicted order parameter  $S^2$  confirmed that the N-terminal domain of both protein  
6 constructs is highly dynamic (**Figure 4 – figure supplement 4**) (Berjanskii & Wishart,  
7 2005).

8  
9 In the ordered C-terminal domain, our secondary structure analysis revealed three  $\alpha$ -  
10 helices similar to previously published structural work on His<sub>6</sub>-IFITM3 (Ling et al., 2016).  
11 However, we found a number of notable differences from this published work in both the  
12 amphipathic region and the transmembrane domain. Two helices were observed in the  
13 amphipathic region for both the His<sub>6</sub>-apo-IFITM3 and His<sub>6</sub>-Cys72-mPalm-IFITM3  
14 constructs: AH1 from Ser61 to Phe67 and AH2 from Cys71 to Lys83 (**Figure 4C**). In our  
15 analysis, AH2 was three residues longer than the published structure (which stretches  
16 from Ile76 to Arg85) and now contained the functional lipidation site, Cys72. Moreover,  
17 our data suggest a loop region from Lys104 to Asn107 followed by a 23-amino acid  
18 helix between Ile108 and Ala131 (**Figure 4C**), differing from the previously described  
19 33-amino acid transmembrane domain (Ala98-Ala131) (Ling et al., 2016).

20  
21 When comparing the secondary structure of our chemically lipidated and non-lipidated  
22 constructs, we found subtle changes in the amphipathic region while the global  
23 secondary structure remained the same. Lipidation at Cys72 caused a small decrease  
24 in the  $\alpha$ -helical confidence directly C-terminal to the site of modification (Phe75 to  
25 Ala77) (**Figure 4C**). Furthermore, lipidation at Cys72 increased the helical propensity of  
26 residues Ala100 to Lys104, possibly indicating the stabilization of a third amphipathic  
27 helix in the region. These changes are indicative of a localized effect on the structure of  
28 IFITM3; however, lipidation does not destabilize the existing secondary structure of  
29 IFITM3 overall, consistent with our molecular dynamics simulations (**Figure 2**).

30  
31 We also used chemical shift perturbation (CSP) analysis to quantify the effect of lipid  
32 modification on the structure of His<sub>6</sub>-IFITM3 (**Figure 4D**). This analysis utilizes the  
33 change in chemical shift of the amide backbone peaks to measure the magnitude of  
34 effect for some change to the protein or environment, in this case the addition of a lipid  
35 analogue at Cys72. This analysis revealed that maleimide-palmitate modification at  
36 Cys72 had a significant effect on the local protein structure with an average perturbation  
37 of 0.049 ppm in the conserved amphipathic region from residue Trp60 to Arg85 (three  
38 times that of the standard deviation threshold,  $\sigma_0$ ). For residue Leu73, directly adjacent  
39 to the site of lipidation, the CSP value reached 0.175 ppm (ten times the threshold  
40 value). Surprisingly, lipidation at Cys72 also seemed to have an effect on the  
41 disordered, soluble N-terminal domain, where 5 residues (Val5, Gln6, Phe9, Ser10, and  
42 Arg49) had a CSP value twice that of the standard deviation threshold. Although  
43 unexpected, this could be due in part to a change in how the disordered N-terminal  
44 region interacts with the DPC micelle when the amphipathic region of His<sub>6</sub>-IFITM3 is  
45 anchored to the membrane via a lipid analogue. This analysis indicates that although  
46 the most distinct change in the structure of IFITM3 is in the region proximal to the site of

1 modification, lipidation at Cys72 can cause distal changes in the IFITM3 backbone.  
 2 These results demonstrate that Cys72-lipidation can significantly affect the backbone  
 3 conformation of IFITM3 and provides a potential structural link between the lipid  
 4 modification and increased antiviral activity of Cys72-lipidated IFITM3.  
 5

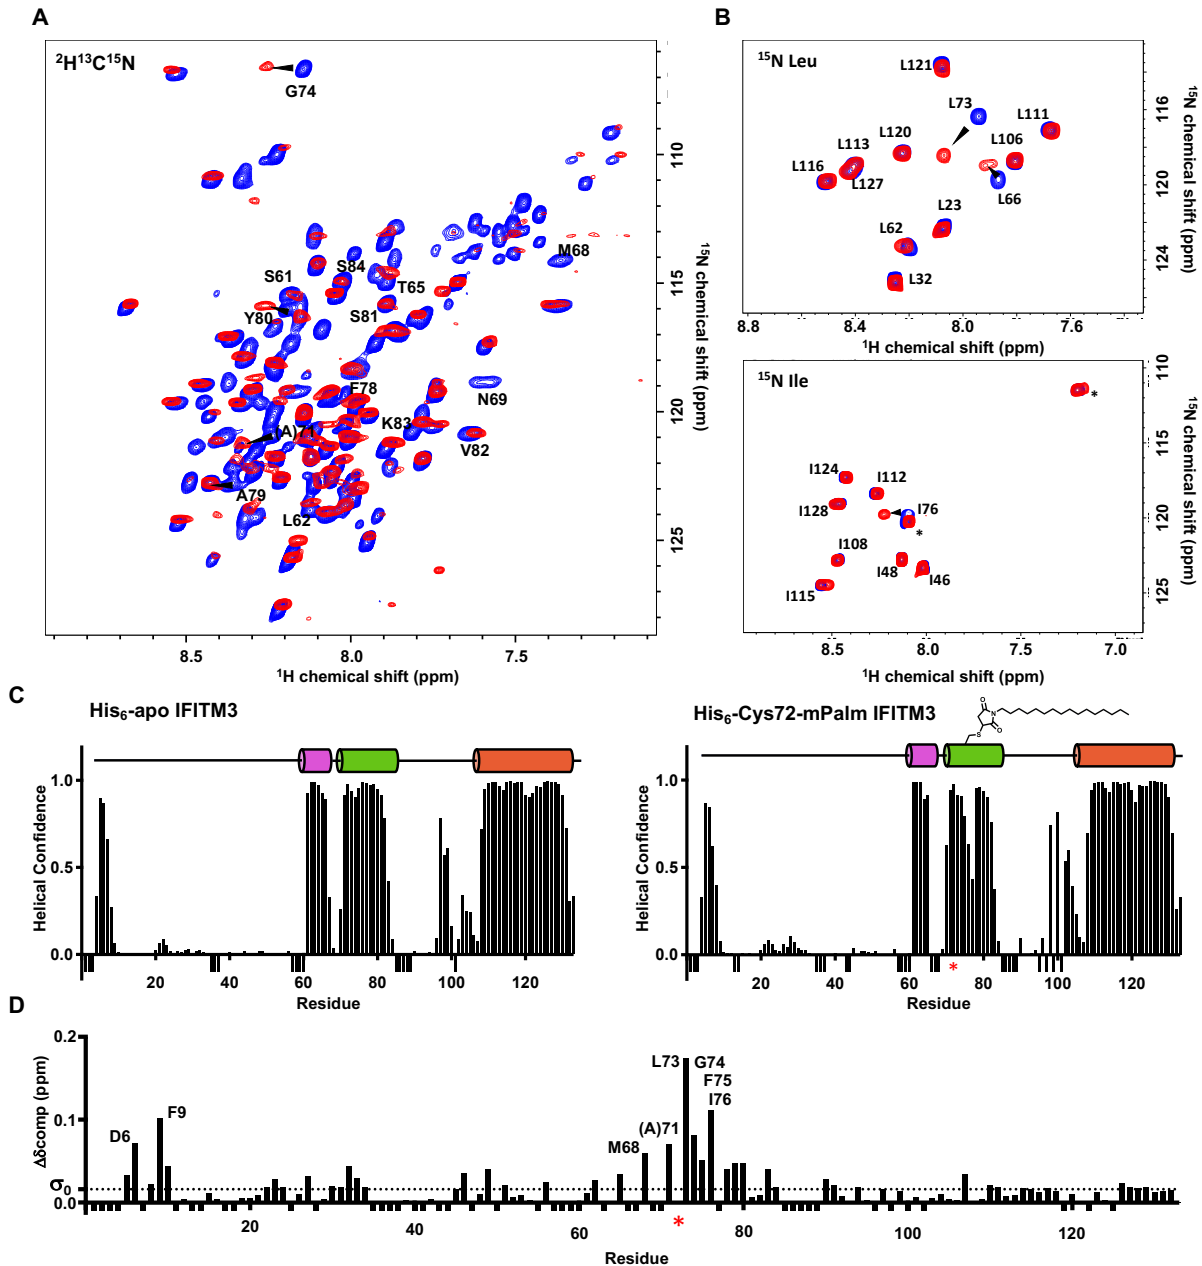

6  
 7 **Figure 4. Comparative structural analysis of apo and C72-mPalm IFITM3 using NMR.** A)  $^1\text{H}$ - $^{15}\text{N}$   
 8 TROSY spectra were recorded using  $^2\text{H}$  $^{13}\text{N}$  $^{15}\text{C}$  uniformly-labeled His<sub>6</sub>-apo (blue) and His<sub>6</sub>-Cys72-mPalm  
 9 (red) IFITM3 in DPC micelles. Representative peaks from the conserved amphipathic region (Trp60 to  
 10 Arg85) are labeled. B)  $^1\text{H}$ - $^{15}\text{N}$  TROSY spectra were collected of specifically labeled  $^{15}\text{N}$ -Leu and  $^{15}\text{N}$ -Ile  
 11 His<sub>6</sub>-apo (blue) and His<sub>6</sub>-Cys72-mPalm (red) IFITM3. Arrows indicate changes in chemical shift  
 12 (quantified in Figure 4D). Asterisks note residues without backbone assignment. C) The secondary  
 13 structures of His<sub>6</sub>-apo and His<sub>6</sub>-Cys72-mPalm IFITM3 were predicted using TALOS+ based on chemical

1 shift and torsional angle information. Residues without assignment due to low signal or spectral overlap  
2 are demarcated by negative bars to distinguish from residues without any helical propensity. The red  
3 asterisk indicates the site of mPalm modification. D) The magnitude of the change in chemical shift  
4 between modified and unmodified IFITM3 was measured by chemical shift perturbation analysis of His<sub>6</sub>-  
5 apo vs. His<sub>6</sub>-Cys72-mPalm IFITM3. Prolines and residues without assignment from either the His<sub>6</sub>-apo or  
6 His<sub>6</sub>-Cys72-mPalm IFITM3 structural analysis are demarcated by negative bars to distinguish from  
7 residues without any change in chemical shift. The standard deviation ( $\sigma_0$ , dotted line) of the net change  
8 in chemical shift was calculated and used as a threshold value. Residues with a greater than  $3\sigma$  change  
9 in chemical shift are labeled.

10 The following figure supplements are available for figure 4:

11 **Figure supplement 1.** <sup>15</sup>N specific labeling of His<sub>6</sub>-apo and His<sub>6</sub>-Cys-mPalm IFITM3 for backbone  
12 assignment.

13 **Figure supplement 2.** Backbone resonance assignment of His<sub>6</sub>-apo IFITM3 overlaid on <sup>1</sup>H-<sup>15</sup>N TROSY  
14 spectra.

15 **Figure supplement 3.** Backbone resonance assignment of His<sub>6</sub>-Cys72-mPalm IFITM3 overlaid on <sup>1</sup>H-  
16 <sup>15</sup>N TROSY spectra.

17 **Figure supplement 4.** Random coil index (RCI) analysis of His<sub>6</sub>-apo IFITM3 and His<sub>6</sub>-Cys72-mPalm  
18 IFITM3.

19  
20  
21 **Biochemical analysis of IFITM3 membrane association.** Beyond a structural  
22 understanding of how lipidation affects IFITM3, we explored how lipidation changed the  
23 interaction of IFITM3 with the local membrane environment. In order to directly test how  
24 lipidation affects the interaction of the amphipathic domain of IFITM3 with a  
25 phospholipid bilayer, we employed a classical flotation assay to measure the  
26 association of this region with reconstituted liposomes. In brief, IFITM3 protein samples  
27 were mixed with pre-formed liposomes and applied to a density gradient for  
28 ultracentrifugation. The liposomes, which contain low-density buffer, float to the top of  
29 the density gradient with any membrane-associated protein, whereas soluble protein  
30 remains at the bottom of the ultracentrifuge tube. The ultracentrifuged sample can be  
31 fractionated and visualized via SDS-PAGE to determine if the protein is associated with  
32 the liposomes (**Figure 5A**).

33  
34 To focus on the activity of the disordered and amphipathic regions of IFITM3, we  
35 designed a truncated construct (Met1-Leu106) that lacked the transmembrane domain  
36 and fused it to a cleavable His<sub>6</sub>-SUMO domain for improved expression. After purifying  
37 His<sub>6</sub>-SUMO-apo IFITM3 and His<sub>6</sub>-SUMO-Cys72 IFITM3 from the crude lysate with a Ni-  
38 NTA column, the SUMO domain was cleaved by ULP1 and IFITM3 was coupled to  
39 mPalm as previously described. The 1-106 IFITM3 constructs were then separated from  
40 the His<sub>6</sub>-SUMO domain by size exclusion. Successful purification and mPalm coupling  
41 was confirmed by MALDI analysis (**Figure 5 – figure supplement 2**). After purification,  
42 these truncated IFITM3 constructs were mixed with preformed 100 nm liposomes and  
43 dialyzed overnight to remove any detergent. Full length His<sub>6</sub>-apo IFITM3 and His<sub>6</sub>-  
44 SUMO were used as positive and negative controls, respectively. For the flotation  
45 assay, these protein-containing liposomes were added to a Histodenz density gradient  
46 and centrifuged at 150,000 x g for 3 hours. The sample was then fractionated and  
47 analyzed using SDS-PAGE to determine whether the protein was associated with the  
48 liposome. Since full length IFITM3 is an integral membrane protein, it fully associated  
49 with liposomes and was only found in the top fraction (**Figure 5B**). His<sub>6</sub>-SUMO, which

1 has no membrane binding properties, was found in the bottom three fractions (**Figure**  
 2 **5B**). For the truncated IFITM3 constructs, liposome binding was correlated with  
 3 lipidation at Cys72 (**Figure 5B**). Indeed, when we quantified the protein content across  
 4 the density gradient, on average only 35% of apo 1-106 IFITM3 was present in the  
 5 liposome-associated fraction, whereas Cys72-mPalm 1-106 IFITM3 was largely found in  
 6 this first fraction (on average 68% of the total liposome protein content) (**Figure 5C**).  
 7 These results show that lipidation at Cys72 increases the affinity of the amphipathic  
 8 region of IFITM3 with the phospholipid bilayer, indicating that lipidation may be required  
 9 to anchor the extended amphipathic region to the membrane, which is consistent with  
 10 our molecular dynamics simulations (**Figure 2**).  
 11

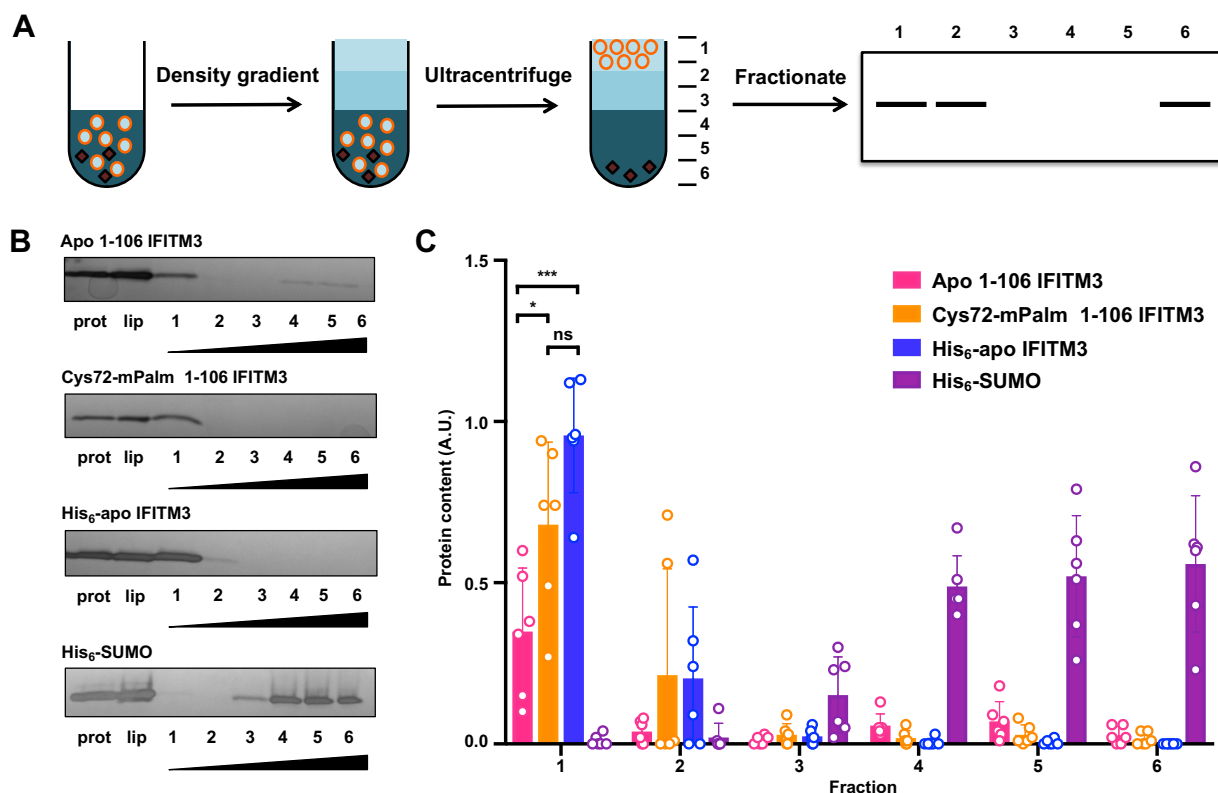

12  
 13 **Figure 5. Flotation assay with lipidated variants of truncated IFITM3.** A) Schematic of a liposome  
 14 flotation assay. The liposome (orange circles) and protein (black) mixture in 40% Histodenz was first  
 15 applied to the bottom of the ultracentrifuge tube. Then, layers of 30% Histodenz and buffer were stacked  
 16 on top of the liposome mixture to form a density gradient. The samples were then ultracentrifuged and  
 17 fractionated. Protein associated with the buoyant liposomes could be visualized in the top fraction, while  
 18 soluble protein remained in the bottom fractions. B) Representative fractionation gels of apo 1-106  
 19 IFITM3, Cys72-mPalm 1-106 IFITM3, full length His<sub>6</sub>-apo IFITM3, and His<sub>6</sub>-SUMO flotation assay with  
 20 lanes for protein alone, liposome control, and fractionated sample was visualized using silver stain.  
 21 Wedges indicate increasing Histodenz concentration. C) Quantification of protein fractions from flotation  
 22 assay normalized to the liposome loading control. The mean was obtained from six independent  
 23 experiments (n=6) and is represented  $\pm$  SD. Data were analyzed by one-way ANOVA with a post-hoc  
 24 Tukey's test (\*p < 0.05, \*\*\*p < 0.0005).  
 25 The following figure supplement is available for figure 5:

26 **Figure supplement 1.** MALDI analysis of apo 1-106 IFITM3 and Cys72-mPalm 1-106 IFITM3 constructs.  
 27  
 28

1 **Site-specific chemical lipidation and antiviral activity of IFITM3 in mammalian**  
2 **cells.** To evaluate site-specific lipidation of IFITM3 in mammalian cells, we employed  
3 genetic code expansion (J. W. Chin, 2014; Liu & Schultz, 2010) and bioorthogonal  
4 labeling (Lang & Chin, 2014; Prescher & Bertozzi, 2005) to install a stable S-  
5 palmitoylation mimic *in vivo* (**Figure 6A**). Since maleimide-palmitate cannot be used to  
6 site-specifically label IFITM3 in mammalian cells, we employed Inverse-Demand Diels  
7 Alder ligation (Selvaraj & Fox, 2013; Šečkutė & Devaraj, 2013) and tetrazine-lipid  
8 derivatives recently developed by our laboratories (**Li Y et al in review, Supplemental**  
9 **File**). For these studies, we used unnatural amino acids (UAAs) with strained alkenes or  
10 alkynes including axial trans-cyclooct-2-ene-lysine (2'-aTCOK) and exo-  
11 bicyclo[6.1.0]nonyne-lysine (exo-BCNK) as well as an alkyne-lysine control (AlkK)  
12 (**Figure 6B**). We mutated Cys72 of HA-tagged IFITM3 to the amber codon TAG to  
13 generate the construct HA-IFITM3-Cys72TAG. HEK293T cells were co-transfected with  
14 plasmids encoding an aminoacyl-tRNA synthetase/tRNA pair Mm-PylRS-AF (Y306A,  
15 Y384F)/Pyl-tRNA and HA-IFITM3-Cys72TAG in the absence or presence of the UAAs.  
16 Western blot analysis showed efficient expression of full length IFITM3 with the UAAs  
17 (**Figure 6 – figure supplement 1**). Following 16-hour transfection, cells were treated  
18 with a tetrazine-lipid mimic (Tz-6) (**Figure 6C**) for bioorthogonal tetrazine ligation  
19 reaction in live cells. The alkyne on Tz-6 enabled in-gel fluorescence profiling of  
20 chemically lipidated IFITM3 (**Figure 6D**). A Cu<sup>I</sup>-catalyzed azide alkyne cycloaddition  
21 (CuAAC) reaction of the cell lysate with azide-rhodamine enabled quantification of the  
22 efficiency of tetrazine ligation with different UAAs (**Figure 6A,D**). IFITM3 modified with  
23 an alkyne-containing UAA (AlkK) was used as a positive control for the CuAAC reaction  
24 and functioned as a benchmark to compare the efficiency of UAA incorporation and  
25 tetrazine ligation for the other UAA-containing constructs (**Figure 6E**). Both the UAAs  
26 showed successful chemical labeling of IFITM3, with the highest labeling efficiency for  
27 exo-BCNK (**Figure 6E**), consistent with our studies of H-Ras (**Li Y et al in review,**  
28 **Supplemental File**). We tested the chemical ligation efficiency at the other Cys sites of  
29 IFITM3, showing robust labeling of HA-IFITM3-Cys71TAG and HA-IFITM3-Cys105TAG  
30 with the tetrazine-lipid mimic Tz-6 (**Figure 6 – figure supplement 2**). We also  
31 evaluated the ligation efficiency with other tetrazine-lipid analogues of shorter aliphatic  
32 chain length (Tz-1) and higher hydrophilicity (Tz-PEG) (**Figure 6 – figure supplement**  
33 **3a**). HA-IFITM3-Cys72TAG showed efficient chemical labeling independent of the  
34 nature of the tetrazine derivatives (**Figure 6 – figure supplement 3b,c**). These results  
35 show that the UAAs are successfully incorporated at specific sites in IFITM3 via genetic  
36 code expansion and can be modified with tetrazine derivatives for site-specific chemical  
37 lipidation of IFITM3 in live cells.

38  
39 We next evaluated the virus susceptibility of HEK293T cells expressing lipidated  
40 IFITM3-Cys72TAG. Cells were infected by H1N1 influenza virus (IAV) for 6 hours, and  
41 viral infection was measured by staining of viral nucleoprotein (NP) and HA-IFITM3 by  
42 flow cytometry. IFITM3 with AlkK at Cys72 cannot undergo tetrazine ligation and  
43 showed no change in antiviral activity on addition of Tz-6 (**Figure 6F**). However, cells  
44 expressing IFITM3 constructs containing 2'-aTCOK and exo-BCNK showed decreased  
45 viral susceptibility upon treatment with Tz-6 (**Figure 6F**), restoring approximately 35% of  
46 the antiviral activity of wild type IFITM3 when compared with a Cys72 to Ala loss-of-

1 function mutant (**Figure 6G**). Immunofluorescence imaging of the cells expressing  
 2 IFITM3 with *exo*-BCNK at Cys72 show endolysosomal localization similar to  
 3 endogenous IFITM3 in HeLa cells (**Figure 6 – figure supplement 4**). Moreover,  
 4 labeling with tetrazine-lipid mimic Tz-6 showed no evident difference in subcellular  
 5 localization (**Figure 6 – figure supplement 4**), suggesting the changes induced by site-  
 6 specific lipidation may be on local membrane interactions rather than drastic changes in  
 7 cellular distribution. Notably, this live cell chemical lipidation approach provides the first  
 8 evidence for gain-of-function by site-specific lipidation of IFITM3 in mammalian cells and  
 9 underscores the significance of Cys72 S-palmitoylation in IFITM3 antiviral activity.  
 10

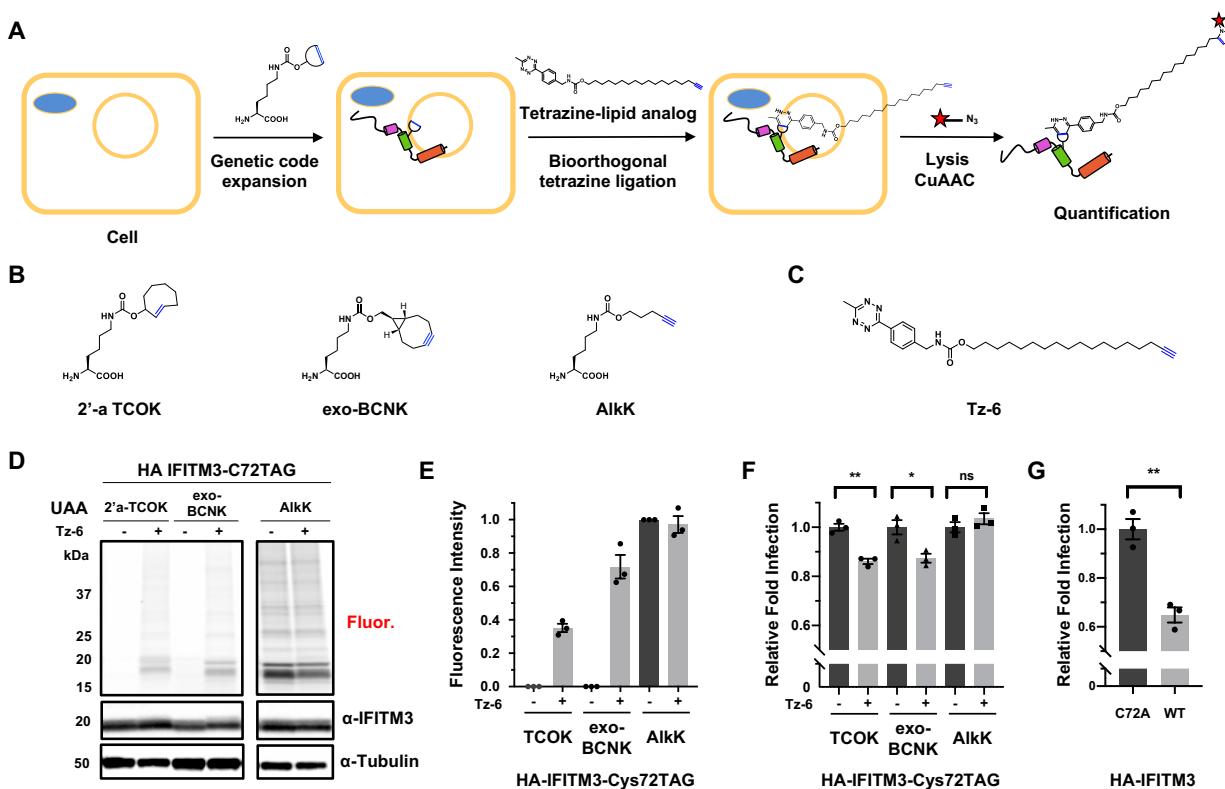

11  
 12 **Figure 6. Chemical lipidation and anti-viral activity of IFITM3 in cells.** A) Scheme for the site-specific  
 13 lipidation of IFITM3 via genetic code expansion for unnatural amino acid incorporation and bioorthogonal  
 14 tetrazine ligation reaction. B) Chemical structures of unnatural amino acids (UAAs) used for genetic code  
 15 expansion and C) fatty acyl tetrazine analog Tz-6 used for tetrazine ligation to UAAs. D) In-gel  
 16 fluorescence profiling of chemical lipidation tetrazine ligation efficiency in cells. HEK293T cells were  
 17 transfected with plasmids encoding an aminoacyl-tRNA synthetase/tRNA pair Mm-PylRS-AF (Y306A,  
 18 Y384F)/Pyl-tRNA and HA-IFITM3-Cys72TAG in the absence or presence of UAAs, after which cells were  
 19 treated with 20  $\mu$ M fatty acyl tetrazine Tz-6. The cell lysates were further reacted with azide-rhodamine for  
 20 in-gel fluorescence profiling of chemically lipidated IFITM3. An anti-IFITM3 blot showed IFITM3  
 21 expression levels in each condition. An anti-tubulin western blot was used as a protein loading control. E)  
 22 Quantification of efficiency of in-cell tetrazine ligation reaction. Data represents mean  $\pm$  S.E.M. for three  
 23 independent experiments. F) Quantification of influenza A virus (IAV) infection assay of HA-IFITM3  
 24 Cys72TAG-expressing cells with and without Tz-6 ligation for a panel of UAAs. Cells expressing HA-  
 25 IFITM3-Cys72TAG with different UAAs were treated with fatty acyl tetrazine analog Tz-6, then infected  
 26 with IAV. Virus nucleoprotein (NP) and HA-IFITM3 protein levels were examined by flow cytometry using



1 anti-NP and anti-IFITM3 staining, respectively. Transfected cells expressing IFITM3 were gated and  
2 analyzed for percentage of infection. Relative fold infection for IFITM3 expressing cells was calculated  
3 with and without Tz-6-treated samples. Data represents mean  $\pm$  S.E.M. for three independent  
4 experiments. Data were analyzed by unpaired Student's t-test (ns  $p > 0.05$ , \* $p < 0.05$ , \*\* $p < 0.005$ ). G)  
5 Quantification of IAV infection assay of HA-IFITM3 wild type (WT) and Cys72 to Ala (C72A) mutant HA-  
6 IFITM3 transfected cells. Cells expressing HA-IFITM3 were infected with IAV and analyzed by flow  
7 cytometry as previously described. Data represents mean  $\pm$  S.E.M. for three independent experiments.  
8 Data were analyzed by unpaired Student's t-test (\*\* $p < 0.005$ ).

9 The following figure supplements are available for figure 6:

10 **Figure supplement 1.** Western blot analysis of HA-IFITM3-Cys72TAG expression with different  
11 unnatural amino acids (JAAs).

12 **Figure supplement 2.** In-gel fluorescence profiling of tetrazine ligation efficiency at different Cys  
13 positions in IFITM3 in cells.

14 **Figure supplement 3.** In-gel fluorescence profiling of tetrazine ligation efficiency with different tetrazine  
15 derivatives in cells.

16 **Figure supplement 4.** Subcellular localization of chemically modified HA-IFITM3-Cys72TAG.  
17  
18

## 19 DISCUSSION

20 IFITMs are key immune effectors conserved across vertebrates that protect against a  
21 broad range of viral pathogens. S-palmitoylation was previously found to be essential  
22 for the antiviral activity of IFITM3, but the direct effects of palmitoylation on its structure  
23 and cellular activity have not been explored due to a lack of accessible chemical tools.  
24 Since S-palmitoylation is required for IFITM3 antiviral activity, a better understanding of  
25 site-specific lipidation is central to delineating its mechanism of action. By developing  
26 new methods for the generation of lipidated IFITM3 both *in vitro* and *in vivo*, we have  
27 been able to directly probe the biophysical and cellular consequences of IFITM3 S-  
28 palmitoylation.  
29

30 The study of S-fatty acylated proteins *in vitro* and in cells has been challenging due to  
31 the hydrophobicity of the modification as well as its reversibility and substoichiometric  
32 levels in cells (Linder & Deschenes, 2007; Resh, 2006). To address these challenges,  
33 site-selective bioconjugation methods, protein semi-synthesis, and genetic code  
34 expansion have been employed to attach lipid analogs to proteins (Hang & Linder,  
35 2011). Using maleimide-palmitate, we have been able to generate lipid-modified  
36 recombinant IFITM3 for a range of biochemical and biophysical studies. Molecular  
37 dynamics simulations of S-palmitoylated IFITM3 and maleimide-palmitate modified  
38 IFITM3 were conducted to determine if maleimide palmitate is an appropriate mimic for  
39 a native S-palmitoyl modification. Both the natural palmitoyl thioester and the synthetic  
40 mimic yielded similar structural changes in our computational models, indicating that  
41 maleimide-palmitate is a reasonable substitute for S-palmitoylation. Surprisingly, the  
42 molecular dynamics simulations also revealed a significant change in the structure of  
43 the amphipathic region of IFITM3 when lipidated, with the stabilization of the functionally  
44 significant AH1 region. Indeed, when Cys72-maleimide palmitate modified IFITM3 was  
45 compared with unmodified IFITM3 using NMR, we found structural changes both locally  
46 and in the disordered N-terminal region. Furthermore, a flotation assay revealed the  
47 disordered and amphipathic regions of Cys72-mPalm IFITM3 had increased association  
48 with the membrane bilayer. We note that maleimide-palmitate modified IFITM3 does not  
49 contain the native thioester linkage, which could be addressed through biophysical

1 studies of site-specifically S-palmitoylated IFITM3 from new protein semisynthesis  
2 methods (Harmand, Pattabiraman, & Bode, 2017; D. L. Huang et al., 2020).

3  
4 For cellular studies, protein semi-synthesis (Rocks et al., 2005; 2010) of site-specifically  
5 lipidated Ras isoforms has been instrumental in elucidating the reversible features of S-  
6 palmitoylated peripheral membrane proteins in mammalian cells. However, IFITMs are  
7 S-palmitoylated type IV membrane proteins that may not insert into cellular membranes  
8 properly and are therefore not ideal for microinjection studies. More recently, genetic  
9 code expansion has been used to site-specifically functionalize proteins with lipid  
10 mimics (Li Y et al in review, Supplemental File). Here, we have leveraged the method  
11 developed by Li Y *et al.* to chemically lipidate cellular IFITM3, expanding the scope of  
12 the technique to integral membrane proteins. This has allowed us to conduct the first  
13 antiviral gain-of-function assay of lipidated IFITM3 in mammalian cells, confirming the  
14 importance of site-specific S-fatty acylation in the regulation of IFITM3 antiviral activity.

15  
16 Together, our results provide the first direct evidence that lipidation can change the  
17 biophysical properties of IFITM3. As the disruption of AH1 is known to attenuate the  
18 antiviral activity of IFITM3 (Chesarino et al., 2017) and may aid in the remodeling of the  
19 endocytic membrane to prevent virus-endosome fusion (Guo et al., 2020), our work  
20 suggests that S-palmitoylation at Cys72 could enhance the antiviral activity of IFITM3  
21 directly through the stabilization of AH1. Furthermore, lipidation of IFITM3 at Cys72 has  
22 been shown to be essential for the engagement of invading viral particles by IFITM3  
23 (Spence et al., 2019; Suddala et al., 2019). AH1 stabilization by Cys72 palmitoylation  
24 may provide a structural mechanism for IFITM3 subcellular partitioning during infection.  
25 As our current *in vitro* work focuses on IFITM3 in detergent and simplified lipid  
26 environments, in the future we can use our novel maleimide-palmitate modified  
27 constructs in more physiologically relevant lipid environments to measure subdomain  
28 localization and lipidation dependent effects on the biophysical properties of the  
29 membrane. Furthermore, live cell imaging studies could be conducted with our  
30 specifically lipidated constructs by using dual unnatural amino acid incorporation for  
31 both lipid modification and fluorescent labeling of IFITM3. Given the unique role of  
32 IFITMs in SARS-CoV-2 infection (Prelli Bozzo et al., 2020; Shi et al., 2020; X. Zhang et  
33 al., 2020a), understanding the regulation of IFITM3 via S-palmitoylation may be  
34 important for determining the host immune response to COVID-19. As S-palmitoylated  
35 IFITM3 is also a key viral restriction factor in common zoonotic disease vectors such as  
36 bats (Benfield et al., 2020), a mechanistic understanding of lipidated IFITM3 may also  
37 be important for the prevention of future disease outbreaks. In summary, our findings  
38 illuminate important links between the protein structure, membrane association, and  
39 antiviral activity of IFITM3, and underscore the significance of integrated *in silico*,  
40 chemical, biophysical, and cellular studies of S-fatty acylation.

41  
42  
43  
44  
45  
46

## 1 MATERIALS AND METHODS

### 2 Molecular dynamics simulations

3 All Molecular dynamics simulation systems were prepared using the CHARMM36 force  
4 field for protein and lipid (B. R. Brooks et al., 2009; Klauda et al., 2010; Venable et al.,  
5 2014). The initial Apo IFITM3 structure was built using IFITM3 sequence data (Ling et  
6 al., 2016) and typical  $\alpha$ -helical  $\phi/\psi$  angles ( $-57.8^\circ$  for  $\phi$  and  $-47.0^\circ$  for  $\psi$ ) for AH1, AH2,  
7 and TM helices. The initial structure was then equilibrated in an implicit solvent (GBSW)  
8 environment with CHARMM (B. R. Brooks et al., 2009; Im, Feig, & Brooks, 2003a; Im,  
9 Lee, & Brooks, 2003b). The positional restraints were applied during the equilibration to  
10 place TM in membrane region and AH1 and AH2 on the membrane surface. After the  
11 equilibration, three simulation systems (Apo, Cys72-Palm, and Cys72-mPalm) were  
12 prepared using CHARMM-GUI (Jo, Kim, Iyer, & Im, 2008) *Membrane Builder* (Jo, Lim,  
13 Klauda, & Im, 2009; Emilia L Wu et al., 2014). The palmitoyl group was added at Cys72  
14 during the *Membrane Builder* system building process for Cys72-Palm system. The  
15 maleimide group in maleimide-palmitate was parameterized by analogy of C3/C5 dyes  
16 in CHARMM-GUI (Jo et al., 2014) and added to the IFITM3 structure for Cys72-mPalm  
17 system. TIP3P water (Jorgensen, Chandrasekhar, Madura, Impey, & Klein, 1983) and  
18 150 mM KCl ion were added to the bulk region with for the ionic strength of cellular  
19 environment. The upper and lower leaflet contains 94 number of DMPC lipids with the  
20 box size of  $80 \times 80 \times 100 \text{ \AA}^3$ . Equilibration of system were conducted with CHARMM-  
21 GUI standard protocol, and the productions were simulated with OpenMM 7.1 (Eastman  
22 et al., 2017). The particle-mesh Ewald method (Essmann et al., 1995) was used for  
23 long-range electrostatic interaction, and the SHAKE algorithm (Ryckaert, Ciccotti, &  
24 Berendsen, 1977) was utilized for fixing all bonds including hydrogen atom. The  
25 temperature of each systems was held at 308.15 K using Langevin dynamics (Goga,  
26 Rzepiela, de Vries, Marrink, & Berendsen, 2012), and pressure was stayed at 1 bar  
27 under the semi-isotropic Monte-Carlo barostat method (Åqvist, Wennerström, Nervall,  
28 Bjelic, & Brandsdal, 2004; Chow & Ferguson, 1995) with a  $5 \text{ ps}^{-1}$  coupling frequency. A  
29 force-based switching method (Steinbach & Brooks, 1994) was used for the van der  
30 Waals interactions under 10 to 12 angstrom cut-off range. To reduce the uncertainty of  
31 sequence-based structure, 1.5  $\mu\text{s}$  of preliminary simulation was performed and the  
32 coordinate information from that of simulation was used for the later simulation. Among  
33 1  $\mu\text{s}$  of production runs, the last 500 ns trajectories were used for analysis, and each  
34 system has 3 replicas to obtain better sampling.

35

### 36 Maleimide palmitate synthesis

37 A round bottom flask was charged with 0.68 g of triphenylphosphine (2.57 mmol, 0.9  
38 eq.) and 17.5 ml of tetrahydrofuran. The flask was placed under argon and cooled to  $-78$   
39  $^\circ\text{C}$ . 1.18 ml of the 40% solution of diethyl azodicarboxylate in toluene (2.57 mmol, 0.9  
40 eq.) were added over a period of 3 minutes. The resulting mixture was stirred for 5  
41 minutes, after which a solution of 0.7 g of hexadecan-1-ol (2.87 mmol, 1 eq.) in a  
42 minimal amount of THF (prepared in an argon purged vial) was added over a period of 1  
43 minute. The resulting solution was stirred for 5 minutes. The flask's septum was then  
44 removed under the protection of an argon curtain and 0.125 g of neopentyl alcohol (1.43  
45 mmol, 0.5 eq.) and 0.25 g of maleimide (2.57 mmol, 0.9 eq.) were added as solids. The  
46 flask was closed again under argon and the reaction mixture was stirred for 5 minutes,

1 after which the cooling bath was removed and the reaction stirred at room temperature  
2 for 16 hours, then at 40 °C for 2 hours. After full conversion was indicated by TLC, the  
3 solvent was evaporated in vacuo. The resulting solid was purified by silica flash  
4 chromatography (loading and elution in dichloromethane). N-1-hexadecylmaleimide was  
5 obtained after high vacuum drying (0.481 g, 52%). H NMR (400 MHz, CDCl<sub>3</sub>) δ ppm  
6 0.88 (t, J=6.59 Hz, 13 3H) 1.25 (br.s.,26H) 1.53-1.60 (m,2H) 3.51 (t,J=7.23Hz,2H) 6.68  
7 (s,2H). CNMR (100MHz, CDCl<sub>3</sub>): δ ppm 14.09, 22.67, 26.73, 28.52, 29.11, 29.34,  
8 29.46, 29.53, 29.64, 31.90, 37.93, 134.00, 170.87. This experimental procedure was  
9 adapted from Matuszak *et al.* (Matuszak, Muccioli, Labar, & Lambert, 2009).

### 10 11 **IFITM3 purification and maleimide-palmitate coupling**

12 To express His<sub>6</sub>-IFITM3, the *E. coli* codon optimized gene was inserted into a pET-28c  
13 vector and transformed into BL21(DE3) *E. coli*, after which cells were grown in LB to 0.8  
14 OD<sub>600</sub> before being induced with 1 mM IPTG overnight at 18°C. Cells were then lysed  
15 with a probe sonicator in 2% TX-100, 25 mM HEPES pH 7.4, 150 mM KCl and 1 mM  
16 TCEP. After ultracentrifugation to remove insoluble cell debris (30K, 30 min, 4°C), the  
17 lysate was diluted to <1% TX-100 with buffer and incubated with cobalt beads for 30  
18 minutes at 4°C. After washing beads with 10x CV of 0.8% TX-100, 25 mM HEPES pH  
19 7.4, 150 mM KCl, and 1 mM TCEP (Buffer A) and 10x CV Buffer A with 40 mM  
20 imidazole, the protein was eluted with 3x CV of Buffer B (Buffer A with 400 mM  
21 imidazole). The sample was then transferred to a 15°C shaker, where it was incubated  
22 with 0.5 mM maleimide palmitate for 2 hours with a final concentration of 10% DMSO.  
23 Post incubation, the sample was diluted with Buffer A until the imidazole concentration  
24 dropped below 20 mM and was incubated with cobalt beads for another 30 minutes.  
25 Beads were washed with 10x CV DPC buffer (0.5% DPC, 25 mM HEPES pH 7.4, 150  
26 mM KCl) before being eluted with DPC buffer + 400 mM imidazole.

### 27 28 **MALDI analysis**

29 1 μL of the sample was mixed with 9 μL of matrix consisting of a saturated solution of α-  
30 cyano-4-hydroxycinnamic acid (4-HCCA) in a 1:3:2 (v/v/v) mixture of formic  
31 acid/water/isopropanol (FWI). An aliquot of 0.5 – 1 μL of this protein-matrix solution was  
32 spotted onto a MALDI plate precoated with an ultrathin layer of 4-HCCA matrix<sup>84,85</sup>. The  
33 sample spots were then washed for a few seconds with 2 μL of cold 0.1% aqueous  
34 trifluoroacetic acid (TFA) solution. MALDI spectra were acquired in linear, delayed  
35 extraction mode using a Spiral TOF JMS-S3000 (JEOL, Tokyo, Japan). The instrument  
36 is equipped with a Nd:YLF laser, delivering 10-Hz pulses at 349 nm. Delayed extraction  
37 time was set at 0.75 – 1 μs and acquisition was performed with a sampling rate of 2 ns.  
38 Each MALDI spectrum corresponded to an average of 1000 scans. Mass calibration  
39 was performed using horse myoglobin as protein calibrant with a technique of pseudo-  
40 internal calibration wherein a few laser shots on a calibrant spot near a sample spot  
41 were collected and averaged with the sample shots into a single spectrum. The spectra  
42 were processed and analyzed using MoverZ (Proteometrics, LLC).

### 43 44 **NMR sample preparation**

45 To express His<sub>6</sub>-IFITM3, the *E. coli* codon optimized gene was inserted into a pET-28c  
46 vector and transformed into BL21(DE3) *E. coli*. For NMR experiments, cells were

1 adapted to 100% D<sub>2</sub>O <sup>13</sup>C<sup>15</sup>N M9 minimal media, before being induced with 1 mM IPTG  
2 overnight at 18°C. After induction, IFITM3 was purified and chemically lipidated as  
3 described above. After purification, samples were concentrated and dialyzed overnight  
4 into the final NMR buffer (0.5% DPC, 25 mM HEPES pH 7, 150 mM KCl). His<sub>6</sub>-apo  
5 IFITM3 spectra were recorded on 150 μM, 350 μM, and 1 mM samples. His<sub>6</sub>-Cys72-  
6 mPalm IFITM3 spectra were recorded on a sample at 350 μM.

### 8 **NMR spectroscopy and analysis**

9 The NMR data was acquired at 35°C (308K) on Bruker 800 and 900 MHz AVANCE  
10 spectrometers equipped with TCI CryoProbes. The backbone resonances of <sup>2</sup>H<sup>13</sup>C<sup>15</sup>N  
11 labeled IFITM3 with and without lipidation were assigned using a suite of  
12 multidimensional N<sup>15</sup>-TROSY based experiments: <sup>15</sup>N-HSQC, HNCA, HNCB, HNCACB,  
13 HN(CO)CA, HN(CO)CACB, HNCACO and <sup>15</sup>N-edited NOESY-HSQC. Spectra analysis  
14 was performed in CARRA. The assignments were confirmed by recording 2D N<sup>15</sup>-TROSY  
15 on selectively N<sup>15</sup>-labeled samples (Ala, Ile, Val, Leu and Phe) with and without  
16 lipidation. The <sup>15</sup>N, <sup>13</sup>C<sub>α</sub>, and <sup>13</sup>C' chemical shift assignments were then used to predict  
17 the dihedral angles of the protein backbone using TALOS+ (Shen et al., 2009). In the  
18 His<sub>6</sub>-apo IFITM3 sample, 70 out of 115 predicted dihedral angles were found to be  
19 “good” by TALOS+. Of the other residues, 19 residues were predicted to be dynamic  
20 (84% of which were in the disordered N-terminal region from residue Met1 to Val59) and  
21 26 residues were found to be ambiguous. Out of those residues, 8 were in the  
22 structured C-terminal domain (Trp60 to Gly133) while 18 were in the disordered N-  
23 terminal region (Met1 to Val59). In the His<sub>6</sub>-Cys72-mPalm IFITM3 sample, 68 out of 106  
24 predicted dihedral angles were found to be “good” by TALOS+, while 25 residues were  
25 predicted to be dynamic (21 residues in the disordered N-terminal region, 4 residues in  
26 the structured C-terminal region). 13 residues were found to be ambiguous, with 5 in the  
27 structured C-terminal domain and 8 in the disordered N-terminal region. For the  
28 chemical shift perturbation analysis, the chemical shift differences were calculated using  
29 a weighted average of the Euclidean distance moved:

$$31 \quad d = \sqrt{\frac{1}{2}[\delta_H^2 + (0.14\delta_N^2)]}$$

32  
33 The standard deviation of the change in chemical shift across the protein was calculated  
34 and used as a threshold value ( $\sigma_0$ ) to identify residues with significant changes in  
35 chemical shift (Williamson, 2013).

### 37 **Truncated construct purification**

38 Truncated IFITM3 constructs were inserted into a SUMO containing pET28c(+) plasmid  
39 (gift from the Lima lab at MSKCC). Lysis and His-tag purification was completed in the  
40 same manner as the full length constructs. After His purification, the samples were  
41 incubated with ULP1 (1:250) overnight at 4°C. The next morning, the samples were  
42 incubated at 15°C for 2 hours with maleimide palmitate. After coupling, the samples  
43 were concentrated and buffer exchanged into 1% OG, 25 mM HEPES, and 150 mM KCl  
44 over size exclusion (SEC200).

1  
2  
3  
4  
5  
6  
7  
8  
9  
10  
11  
12  
13  
14  
15  
16  
17  
18  
19  
20  
21  
22  
23  
24  
25  
26  
27  
28  
29  
30  
31  
32  
33  
34  
35  
36  
37  
38  
39  
40  
41  
42  
43  
44  
45  
46

**Flotation assay**

Liposomes were prepared by extruding 5mM lipid stock (80:20 POPC:Cholesterol) through a 100nm filter. As maleimide-palmitate modified 1-106 IFITM3 was unstable without detergent, the liposomes were mixed 1:1 with protein in 1% OG, 25 mM HEPES, 150 mM KCl so the final protein concentration was 1 μM and the detergent saturated but did not solubilize the liposomes (Rigaud & Lévy, 2003). The liposomes were then incubated at RT for 1 hour to promote protein incorporation, after which the liposomes were dialyzed into 25 mM HEPES and 150 mM KCl overnight at 4°C. Buffer was exchanged after 1 hour, then again for 2 hours the next morning. For the flotation assay, liposomes were mixed with 80% histodenz solution so the final concentration was 40%. 600 μL of this 40% histodenz solution was layered in the bottom of the ultracentrifuge tube, followed by 400 μL 30% histodenz and 200 μL buffer. The samples were ultracentrifuged at 150,000 x g for 3 hours at 4°C, after which each sample was fractionated and acetone precipitated overnight at -20°C. The protein pellets were resuspended in SDS and quantified using silver stain.

**Cell culture and reagents**

HEK293T cells were purchased from ATCC and cultured in Dulbecco's Modified Eagle's Medium (DMEM, high glucose; Gibco) supplemented with 10% fetal bovine serum (FBS; VWR). Influenza A/PR/8/34 (H1N1) (10100374) was from Charles River Laboratories. Influenza A virus nucleoprotein antibody [AA5H] (ab20343) was from Abcam. Alexa-Fluor 647 Antibody Labeling Kit (A20186) was ordered from Life Technologies. Anti-HA antibody conjugated to Alexa-Fluor 594 was purchased from Life Technologies. Anti-HA HRP-conjugated antibody was ordered from Roche.

**Plasmid transfection**

pCMV-Mm-PylRS-WT plasmid was kindly provided by Professor Peng R. Chen at Peking University (Zhang et al., 2011). pCMV-FLAG-Mm-PylRS-AF (Y306A and Y384F double mutant of wild-type PylRS) were generated in the lab by site-directed mutagenesis of pCMV-Mm-PylRS-WT and introducing an in-frame N-terminal FLAG tag. Human IFITM3 cDNA was purchased from Open Biosystems and PCR cloned into pCMV-HA vector (Clontech). All mutants of IFITM3 were generated by using QuikChange II Site-Directed Mutagenesis Kit (Agilent Technologies, #200523). Lipofectamine 3000 from Thermo Scientific was used for transfection of HEK293T cells.

**Chemical lipidation of IFITM3**

HEK293T cells were seeded on 6-well plates and cultured overnight. The next day cells were co-transfected with the plasmid encoding aminoacyl-tRNA synthetase/tRNA pair Mm-PylRS-AF (Y306A, Y384F)/Pyl-tRNA (0.5 μg) and HA-IFITM3-Cys72TAG (0.5 μg) using 3 μL Lipofectamine 3000 in complete cell growth media containing UAAs (100 μM) for 16 h. Then cells were treated with tetrazine-lipid (20 μM) for 2 h. Cells were lysed with 4% SDS lysis buffer (4% SDS, 150 mM NaCl, 50 mM triethanolamine pH 7.4, Roche protease inhibitor, benzonase). Protein concentrations were determined by the BCA assay (Pierce). Protein concentration of cell lysate was normalized to 1.6 μg/ml.

### 1 **Fluorophore labeling of chemically lipidated IFITM3**

2 45 µl of the cell lysate was treated with 5 µl of CuAAC reactant solution (0.5 µl of 10 mM  
3 azido-rhodamine (final concentration 100 µM), 1 µl of 50 mM freshly prepared  
4 CuSO<sub>4</sub>·5H<sub>2</sub>O in H<sub>2</sub>O (final concentration 1 mM, Sigma), 1 µl of 50 mM freshly prepared  
5 TCEP (final concentration 1 mM) and 2.5 µl of 10 mM Tris[(1-benzyl-1H-1,2,3-triazol-4-  
6 yl)methyl]amine (TBTA) (final concentration 500 µM)) was added. The samples were  
7 rocked at room temperature for 1 h.

### 8 9 **In-gel fluorescence profiling and western blot**

10 Protein pellet was precipitated by using a mixture of methanol-chloroform-H<sub>2</sub>O (4:1.5:3,  
11 relative to sample volume). After mixing by inversion several times, samples were  
12 centrifuged at 20,000x g for 5 min at 4°C. Two separate phases were observed with a  
13 protein pellet between the two. After carefully removing the aqueous (top) layer, 1 mL of  
14 prechilled methanol was added and centrifuged. After another wash with methanol, the  
15 protein pellet was dried using speed-vacuum for 10 min. The pellet was resuspended in  
16 1X Laemmli sample buffer (20 µl) and was heated for 10 min at 95 °C and separated by  
17 gel electrophoresis. In-gel fluorescence scanning was performed using a Bio-Rad  
18 ChemiDoc MP Imaging System. Gels were transferred to nitrocellulose membranes  
19 using BioRad Trans-Blot Semi-Dry Cell (20 V, 40 min), which were blocked with PBST  
20 (0.05% Tween-20 in PBS) containing 5% nonfat milk for 1 h at room temperature. The  
21 membranes were then incubated with anti-HA HRP conjugate (3F10, Roche, 1:2000  
22 dilution) overnight at 4 °C. After overnight incubation, membranes were washed with  
23 PBST three times and developed using Bio-Rad Clarity Western ECL substrate and  
24 imaged with a Bio-Rad ChemiDoc MP Imager. Quantification of band intensities in  
25 fluorescence gels and Western blotting were performed with Image Lab (Bio-Rad). Data  
26 from three biological replicates were quantified and averaged for plotting.

### 27 28 **Influenza A virus infection assay**

29 For the infection assay, HEK293T cells were transfected and treated as described  
30 above to express chemically lipidated IFITM3. Then the cells were infected  
31 with influenza virus A/PR/8/34 virus (H1N1) with MOI of 2.5. After 6 h, cells were  
32 washed with PBS, trypsinized, and collected in cluster tubes. Cells were washed again  
33 with PBS and then fixed with 240 µl of 4% PFA in PBS for 5 min. The fixed cells were  
34 permeabilized with 200 µl of 0.2% saponin in PBS for 10 min and then blocked with 200  
35 µL of 0.2% BSA and 0.2% saponin in PBS for 10 min. Cells were treated with anti-  
36 influenza NP antibody conjugated to AlexaFluor-647 (1:250) and anti-HA antibody  
37 conjugated to AlexaFluor-594 (1:250) in 0.02% saponin in PBS. After three washes with  
38 0.02% saponin in PBS, cells were resuspended in 100 µL PBS containing 0.2% BSA  
39 and 0.02% saponin. The samples were analyzed by flow cytometry (BD LSR II). Data  
40 analysis was performed using FlowJo software. All samples were first gated by IFITM3-  
41 positive staining, indicating successful transfection, and then NP-positive percentage of  
42 NP-positive staining, indicated successful infection.

1 **ACKNOWLEDGEMENTS**

2  
3 E. H. Garst and T. Das were supported by the Tri-Institutional Chemical Biology  
4 program through the NIH Chemistry-Biology Training Grant T32 GM115327. A. Percher  
5 was supported by an NSF Graduate Research Fellowship. We thank P.D.R Olinares  
6 and B.T. Chait for technical assistance and discussion of MALDI analysis. We thank M.  
7 Griffin, J. Yount, and T. Walz for helpful discussion and input into this manuscript. The  
8 data collected at NYSBC was made possible by a grant from ORIP/NIH facility  
9 improvement grant CO6RR015495. The 900 MHz NMR spectrometers were purchased  
10 with funds from NIH grant P41GM066354 and the New York State Assembly. T. Peng  
11 acknowledges support from National Natural Science Foundation of China (21778010)  
12 and Shenzhen Science and Technology Innovation Committee  
13 (JCYJ20170412150832022). This work was supported by NSF MCB-1810695 (to W.  
14 Im) and NIH-NIGMS R01GM087544 grant (to H.C. Hang).



## 1 REFERENCES

- 2
- 3 Abrami, L., Kunz, B., Iacovache, I., & van der Goot, F. G. (2008). Palmitoylation and  
4 ubiquitination regulate exit of the Wnt signaling protein LRP6 from the endoplasmic  
5 reticulum. *Proceedings of the National Academy of Sciences of the United States of*  
6 *America*, 105(14), 5384–5389. <http://doi.org/10.1073/pnas.0710389105>
- 7 Abrami, L., Leppla, S. H., & van der Goot, F. G. (2006). Receptor palmitoylation and  
8 ubiquitination regulate anthrax toxin endocytosis. *The Journal of Cell Biology*,  
9 172(2), 309–320. <http://doi.org/10.1083/jcb.200507067>
- 10 Allen, E. K., Randolph, A. G., Bhangale, T., Dogra, P., Ohlson, M., Oshansky, C. M., et  
11 al. (2017). SNP-mediated disruption of CTCF binding at the IFITM3 promoter is  
12 associated with risk of severe influenza in humans. *Nature Medicine*, 59, 1057–13.  
13 <http://doi.org/10.1038/nm.4370>
- 14 Amini-Bavil-Olyaei, S., Choi, Y. J., Lee, J. H., Shi, M., Huang, I.-C., Farzan, M., & Jung,  
15 J. U. (2013). The Antiviral Effector IFITM3 Disrupts Intracellular Cholesterol  
16 Homeostasis to Block Viral Entry. *Cell Host and Microbe*, 13(4), 452–464.  
17 <http://doi.org/10.1016/j.chom.2013.03.006>
- 18 Åqvist, J., Wennerström, P., Nervall, M., Bjelic, S., & Brandsdal, B. O. (2004). Molecular  
19 dynamics simulations of water and biomolecules with a Monte Carlo constant  
20 pressure algorithm. *Chemical Physics Letters*, 384(4-6), 288–294.  
21 <http://doi.org/10.1016/j.cplett.2003.12.039>
- 22 Bailey, C. C., Huang, I.-C., Kam, C., & Farzan, M. (2012). Ifitm3 limits the severity of  
23 acute influenza in mice. *PLoS Pathogens*, 8(9), e1002909.  
24 <http://doi.org/10.1371/journal.ppat.1002909>
- 25 Bailey, C. C., Kondur, H. R., Huang, I.-C., & Farzan, M. (2013). Interferon-induced  
26 transmembrane protein 3 is a type II transmembrane protein. *The Journal of*  
27 *Biological Chemistry*, 288(45), 32184–32193.  
28 <http://doi.org/10.1074/jbc.M113.514356>
- 29 Bailey, C. C., Zhong, G., Huang, I.-C., & Farzan, M. (2014). IFITM-Family Proteins: The  
30 Cell's First Line of Antiviral Defense. *Annual Review of Virology*, 1(1), 261–283.  
31 <http://doi.org/10.1146/annurev-virology-031413-085537>
- 32 Benfield, C. T., MacKenzie, F., Ritzefeld, M., Mazzon, M., Weston, S., Tate, E. W., et al.  
33 (2020). Bat IFITM3 restriction depends on S-palmitoylation and a polymorphic site  
34 within the CD225 domain. *Life Science Alliance*, 3(1), e201900542–18.  
35 <http://doi.org/10.26508/lsa.201900542>
- 36 Berjanskii, M. V., & Wishart, D. S. (2005). A simple method to predict protein flexibility  
37 using secondary chemical shifts. *Journal of the American Chemical Society*,  
38 127(43), 14970–14971. <http://doi.org/10.1021/ja054842f>
- 39 Brass, A. L., Huang, I.-C., Benita, Y., John, S. P., Krishnan, M. N., Feeley, E. M., et al.  
40 (2009). The IFITM Proteins Mediate Cellular Resistance to Influenza A H1N1 Virus,  
41 West Nile Virus, and Dengue Virus. *Cell*, 139(7), 1243–1254.  
42 <http://doi.org/10.1016/j.cell.2009.12.017>
- 43 Brooks, B. R., Brooks, C. L., III, Mackerell, A. D., Jr., Nilsson, L., Petrella, R. J., Roux,  
44 B., et al. (2009). CHARMM: The biomolecular simulation program. *Journal of*  
45 *Computational Chemistry*, 30(10), 1545–1614. <http://doi.org/10.1002/jcc.21287>
- 46 Buchrieser, J., Degrelle, S. A., Couderc, T., Nevers, Q., Disson, O., Manet, C., et al.

1 (2019). IFITM proteins inhibit placental syncytiotrophoblast formation and promote  
2 fetal demise. *Science (New York, N.Y.)*, 365(6449), 176–180.  
3 <http://doi.org/10.1126/science.aaw7733>

4 Buchrieser, J., Dufloo, J., Hubert, M., Monel, B., Planas, D., Rajah, M. M., et al. (2020).  
5 Syncytia formation by SARS-CoV-2 infected cells. *BioRxiv*, 395, 497–25.  
6 <http://doi.org/10.1101/2020.07.14.202028>

7 Chesarino, N. M., Compton, A. A., McMichael, T. M., Kenney, A. D., Zhang, L.,  
8 Soewarna, V., et al. (2017). IFITM3 requires an amphipathic helix for antiviral  
9 activity. *EMBO Reports*, e201744100–12. <http://doi.org/10.15252/embr.201744100>

10 Chesarino, N. M., McMichael, T. M., & Yount, J. S. (2014a). Regulation of the trafficking  
11 and antiviral activity of IFITM3 by post-translational modifications. *Future*  
12 *Microbiology*, 9(10), 1151–1163. <http://doi.org/10.2217/fmb.14.65>

13 Chesarino, N. M., McMichael, T. M., Hach, J. C., & Yount, J. S. (2014b).  
14 Phosphorylation of the Antiviral Protein Interferon-inducible Transmembrane Protein  
15 3 (IFITM3) Dually Regulates Its Endocytosis and Ubiquitination. *The Journal of*  
16 *Biological Chemistry*, 289(17), 11986–11992.  
17 <http://doi.org/10.1074/jbc.M114.557694>

18 Chin, J. W. (2014). Expanding and Reprogramming the Genetic Code of Cells and  
19 Animals. *Annual Review of Biochemistry*, 83(1), 379–408.  
20 <http://doi.org/10.1146/annurev-biochem-060713-035737>

21 Chow, K.-H., & Ferguson, D. M. (1995). Isothermal-isobaric molecular dynamics  
22 simulations with Monte Carlo volume sampling. *Computer Physics Communications*,  
23 91(1-3), 283–289. [http://doi.org/10.1016/0010-4655\(95\)00059-O](http://doi.org/10.1016/0010-4655(95)00059-O)

24 Compton, A. A., Roy, N., Porrot, F., Billet, A., Casartelli, N., Yount, J. S., et al. (2016).  
25 Natural mutations in IFITM3 modulate post-translational regulation and toggle  
26 antiviral specificity. *EMBO Reports*, 17(11), 1657–1671.  
27 <http://doi.org/10.15252/embr.201642771>

28 Desai, T. M., Marin, M., Chin, C. R., Savidis, G., Brass, A. L., & Melikyan, G. B. (2014).  
29 IFITM3 Restricts Influenza A Virus Entry by Blocking the Formation of Fusion Pores  
30 following Virus-Endosome Hemifusion. *PLoS Pathogens*, 10(4), e1004048–16.  
31 <http://doi.org/10.1371/journal.ppat.1004048>

32 Eastman, P., Swails, J., Chodera, J. D., McGibbon, R. T., Zhao, Y., Beauchamp, K. A.,  
33 et al. (2017). OpenMM 7: Rapid development of high performance algorithms for  
34 molecular dynamics. *PLOS Computational Biology*, 13(7), e1005659–17.  
35 <http://doi.org/10.1371/journal.pcbi.1005659>

36 El-Gebali, S., Mistry, J., Bateman, A., Eddy, S. R., Luciani, A., Potter, S. C., et al.  
37 (2018). The Pfam protein families database in 2019. *Nucleic Acids Research*,  
38 47(D1), D427–D432. <http://doi.org/10.1093/nar/gky995>

39 Essmann, U., Perera, L., Berkowitz, M. L., Darden, T., Lee, H., & Pedersen, L. G.  
40 (1995). A smooth particle mesh Ewald method. *The Journal of Chemical Physics*,  
41 103(19), 8577–8593. <http://doi.org/10.1063/1.470117>

42 Everitt, A. R., Clare, S., Pertel, T., John, S. P., Wash, R. S., Smith, S. E., et al. (2012).  
43 IFITM3 restricts the morbidity and mortality associated with influenza. *Nature*,  
44 484(7395), 519–523. <http://doi.org/10.1038/nature10921>

45 Friedman, R. L., Manly, S. P., McMahon, M., Kerr, I. M., & Stark, G. R. (1984).  
46 Transcriptional and posttranscriptional regulation of interferon-induced gene

1 expression in human cells. *Cell*, 38(3), 745–755.

2 Goga, N., Rzepiela, A. J., de Vries, A. H., Marrink, S. J., & Berendsen, H. J. C. (2012).  
3 Efficient Algorithms for Langevin and DPD Dynamics. *Journal of Chemical Theory*  
4 *and Computation*, 8(10), 3637–3649. <http://doi.org/10.1021/ct3000876>

5 Guo, X., Steinkuhler, J., Marin, M., Li, X., Lu, W., Dimova, R., & Melikyan, G. B. (2020).  
6 Interferon-Induced Transmembrane Protein 3 Blocks Fusion of Diverse Enveloped  
7 Viruses by Locally Altering Mechanical Properties of Cell Membranes. *BioRxiv*, 1–  
8 41.

9 Hang, H. C., & Linder, M. E. (2011). Exploring Protein Lipidation with Chemical Biology,  
10 1–18. <http://doi.org/10.1021/cr2001977>

11 Hannoush, R. N., & Sun, J. (2010). The chemical toolbox for monitoring protein fatty  
12 acylation and prenylation. *Nature Chemical Biology*, 6(7), 498–506.  
13 <http://doi.org/10.1038/nchembio.388>

14 Harmand, T. J., Pattabiraman, V. R., & Bode, J. W. (2017). Chemical Synthesis of the  
15 Highly Hydrophobic Antiviral Membrane Associated Protein IFITM3 and Modified  
16 Variants. *Angewandte Chemie International Edition*, 1–7.  
17 <http://doi.org/10.1002/anie.201707554>

18 Hoffmann, M., Kleine-Weber, H., Schroeder, S., Krüger, N., Herrler, T., Erichsen, S., et  
19 al. (2020a). SARS-CoV-2 Cell Entry Depends on ACE2 and TMPRSS2 and Is  
20 Blocked by a Clinically Proven Protease Inhibitor. *Cell*, 181(2), 271–280.e8.  
21 <http://doi.org/10.1016/j.cell.2020.02.052>

22 Hoffmann, M., Mösbauer, K., Hofmann-Winkler, H., Kaul, A., Kleine-Weber, H., Krüger,  
23 N., et al. (2020b). Chloroquine does not inhibit infection of human lung cells with  
24 SARS-CoV-2. *Nature*, 1–5. <http://doi.org/10.1038/s41586-020-2575-3>

25 Huang, D. L., Montigny, C., Zheng, Y., Beswick, V., Li, Y., Cao, X. X., et al. (2020).  
26 Chemical Synthesis of Native S-Palmitoylated Membrane Proteins through  
27 Removable-Backbone-Modification-Assisted Ser/Thr Ligation. *Angewandte Chemie*  
28 *International Edition*, 59(13), 5178–5184. <http://doi.org/10.1002/anie.201914836>

29 Huang, I.-C., Bailey, C. C., Weyer, J. L., Radoshitzky, S. R., Becker, M. M., Chiang, J.  
30 J., et al. (2011). Distinct Patterns of IFITM-Mediated Restriction of Filoviruses,  
31 SARS Coronavirus, and Influenza A Virus. *PLoS Pathogens*, 7(1), e1001258–13.  
32 <http://doi.org/10.1371/journal.ppat.1001258>

33 Im, W., Feig, M., & Brooks, C. L., III. (2003a). An Implicit Membrane Generalized Born  
34 Theory for the Study of Structure, Stability, and Interactions of Membrane Proteins.  
35 *Biophysj*, 85(5), 2900–2918. [http://doi.org/10.1016/S0006-3495\(03\)74712-2](http://doi.org/10.1016/S0006-3495(03)74712-2)

36 Im, W., Lee, M. S., & Brooks, C. L. (2003b). Generalized born model with a simple  
37 smoothing function. *Journal of Computational Chemistry*, 24(14), 1691–1702.  
38 <http://doi.org/10.1002/jcc.10321>

39 Infusini, G., Smith, J. M., Yuan, H., Pizzolla, A., Ng, W. C., Londrigan, S. L., et al.  
40 (2015). Respiratory DC Use IFITM3 to Avoid Direct Viral Infection and Safeguard  
41 Virus-Specific CD8+ T Cell Priming. *PLoS ONE*, 10(11), e0143539–15.  
42 <http://doi.org/10.1371/journal.pone.0143539>

43 Jo, S., Cheng, X., Islam, S. M., Huang, L., Rui, H., Zhu, A., et al. (2014). CHARMM-GUI  
44 PDB Manipulator for Advanced Modeling and Simulations of Proteins Containing  
45 Nonstandard Residues. *Biomolecular Modelling and Simulations* (1st ed., Vol. 96,  
46 pp. 235–265). Elsevier Inc. <http://doi.org/10.1016/bs.apcsb.2014.06.002>

- 1 Jo, S., Kim, T., Iyer, V. G., & Im, W. (2008). CHARMM-GUI: A web-based graphical  
2 user interface for CHARMM. *Journal of Computational Chemistry*, 29(11), 1859–  
3 1865. <http://doi.org/10.1002/jcc.20945>
- 4 Jo, S., Lim, J. B., Klauda, J. B., & Im, W. (2009). CHARMM-GUI Membrane Builder for  
5 Mixed Bilayers and Its Application to Yeast Membranes. *Biophysj*, 97(1), 50–58.  
6 <http://doi.org/10.1016/j.bpj.2009.04.013>
- 7 John, S. P., Chin, C. R., Perreira, J. M., Feeley, E. M., Aker, A. M., Savidis, G., et al.  
8 (2013). The CD225 domain of IFITM3 is required for both IFITM protein association  
9 and inhibition of influenza A virus and dengue virus replication. *Journal of Virology*,  
10 87(14), 7837–7852. <http://doi.org/10.1128/JVI.00481-13>
- 11 Jorgensen, W. L., Chandrasekhar, J., Madura, J. D., Impey, R. W., & Klein, M. L.  
12 (1983). Comparison of simple potential functions for simulating liquid water. *The*  
13 *Journal of Chemical Physics*, 79(2), 926–935. <http://doi.org/10.1063/1.445869>
- 14 Kenney, A. D., McMichael, T. M., Imas, A., Chesarino, N. M., Zhang, L., Dorn, L. E., et  
15 al. (2019). IFITM3 protects the heart during influenza virus infection. *Proceedings of*  
16 *the National Academy of Sciences of the United States of America*, 116(37), 18607–  
17 18612. <http://doi.org/10.1073/pnas.1900784116>
- 18 Klauda, J. B., Venable, R. M., Freites, J. A., O'Connor, J. W., Tobias, D. J., Mondragon-  
19 Ramirez, C., et al. (2010). Update of the CHARMM all-atom additive force field for  
20 lipids: validation on six lipid types. *The Journal of Physical Chemistry B*, 114(23),  
21 7830–7843. <http://doi.org/10.1021/jp101759q>
- 22 Lakkaraju, A. K., Abrami, L., Lemmin, T., Blaskovic, S., Kunz, B. E. A., Kihara, A., et al.  
23 (2012). Palmitoylated calnexin is a key component of the  
24 ribosome&ndash;translocon complex. *The EMBO Journal*, 31(7), 1823–1835.  
25 <http://doi.org/10.1038/emboj.2012.15>
- 26 Lang, K., & Chin, J. W. (2014). Cellular incorporation of unnatural amino acids and  
27 bioorthogonal labeling of proteins. *Chemical Reviews*, 114(9), 4764–4806.  
28 <http://doi.org/10.1021/cr400355w>
- 29 Levental, I., Lingwood, D., Grzybek, M., Coskun, Ü., & Simons, K. (2010).  
30 Palmitoylation regulates raft affinity for the majority of integral raft proteins.  
31 *Proceedings of the National Academy of Sciences of the United States of America*,  
32 107(51), 22050–22054. <http://doi.org/10.1073/pnas.1016184107>
- 33 Linder, M. E., & Deschenes, R. J. (2007). Palmitoylation: policing protein stability and  
34 traffic. *Nature Reviews Molecular Cell Biology*, 8(1), 74–84.  
35 <http://doi.org/10.1038/nrm2084>
- 36 Ling, S., Zhang, C., Wang, W., Cai, X., Yu, L., Wu, F., et al. (2016). Combined  
37 approaches of EPR and NMR illustrate only one transmembrane helix in the human  
38 IFITM3. *Scientific Reports*, 1–8. <http://doi.org/10.1038/srep24029>
- 39 Liu, C. C., & Schultz, P. G. (2010). Adding New Chemistries to the Genetic Code.  
40 *Annual Review of Biochemistry*, 79(1), 413–444.  
41 <http://doi.org/10.1146/annurev.biochem.052308.105824>
- 42 Makvandi-Nejad, S., Laurenson-Schafer, H., Wang, L., Wellington, D., Zhao, Y., Jin, B.,  
43 et al. (2017). Lack of Truncated IFITM3 Transcripts in Cells Homozygous for the  
44 rs12252-C Variant That is Associated With Severe Influenza Infection. *The Journal*  
45 *of Infectious Diseases*, 217(2), 257–262. <http://doi.org/10.1093/infdis/jix512>
- 46 Matuszak, N., Muccioli, G. G., Labar, G., & Lambert, D. M. (2009). Synthesis and in

1 vitro evaluation of N-substituted maleimide derivatives as selective monoglyceride  
2 lipase inhibitors. *Journal of Medicinal Chemistry*, 52(23), 7410–7420.  
3 <http://doi.org/10.1021/jm900461w>

4 McMichael, T. M., Zhang, L., Chemudupati, M., Hach, J. C., Kenney, A. D., Hang, H. C.,  
5 & Yount, J. S. (2017). The palmitoyltransferase ZDHHC20 enhances interferon-  
6 induced transmembrane protein 3 (IFITM3) palmitoylation and antiviral activity. *The*  
7 *Journal of Biological Chemistry*, 292(52), 21517–21526.  
8 <http://doi.org/10.1074/jbc.M117.800482>

9 Peng, T., & Hang, H. C. (2016). Site-Specific Bioorthogonal Labeling for Fluorescence  
10 Imaging of Intracellular Proteins in Living Cells. *Journal of the American Chemical*  
11 *Society*, 138(43), 14423–14433. <http://doi.org/10.1021/jacs.6b08733>

12 Percher, A., Ramakrishnan, S., Thinon, E., Yuan, X., Yount, J. S., & Hang, H. C. (2016).  
13 Mass-tag labeling reveals site-specific and endogenous levels of protein S-fatty  
14 acylation. *Proceedings of the National Academy of Sciences of the United States of*  
15 *America*, 113(16), 4302–4307. <http://doi.org/10.1073/pnas.1602244113>

16 Pereira, J. M., Chin, C. R., Feeley, E. M., & Brass, A. L. (2013). IFITMs Restrict the  
17 Replication of Multiple Pathogenic Viruses. *Journal of Molecular Biology*, 425(24),  
18 4937–4955. <http://doi.org/10.1016/j.jmb.2013.09.024>

19 Prelli Bozzo, C., Nchioua, R., Volcic, M., Wettstein, L., Weil, T., Krueger, J., et al.  
20 (2020). IFITM proteins promote SARS-CoV-2 infection in human lung cells, 1–47.  
21 <http://doi.org/10.1101/2020.08.18.255935>

22 Prescher, J. A., & Bertozzi, C. R. (2005). Chemistry in living systems. *Nature Chemical*  
23 *Biology*, 1(1), 13–21. <http://doi.org/10.1038/nchembio0605-13>

24 Rahman, K., Coomer, C. A., Majdoul, S., Ding, S., Padilla-Parra, S., & Compton, A. A.  
25 (2020). Homology-guided identification of a conserved motif linking the antiviral  
26 functions of IFITM3 to its oligomeric state. *BioRxiv*, 1–32.

27 Randolph, A. G., Yip, W.-K., Allen, E. K., Rosenberger, C. M., Agan, A. A., Ash, S. A., et  
28 al. (2017). Evaluation of IFITM3 rs12252 Association With Severe Pediatric  
29 Influenza Infection. *The Journal of Infectious Diseases*, 216(1), 14–21.  
30 <http://doi.org/10.1093/infdis/jix242>

31 Resh, M. D. (2006). Trafficking and signaling by fatty-acylated and prenylated proteins.  
32 *Nature Chemical Biology*, 2(11), 584–590. <http://doi.org/10.1038/nchembio834>

33 Rigaud, J.-L., & Lévy, D. (2003). Reconstitution of membrane proteins into liposomes.  
34 *Methods in Enzymology*, 372, 65–86. [http://doi.org/10.1016/S0076-6879\(03\)72004-](http://doi.org/10.1016/S0076-6879(03)72004-7)  
35 7

36 Rocks, O., Gerauer, M., Vartak, N., Koch, S., Huang, Z.-P., Pechlivanis, M., et al.  
37 (2010). The Palmitoylation Machinery Is a Spatially Organizing System for  
38 Peripheral Membrane Proteins. *Cell*, 141(3), 458–471.  
39 <http://doi.org/10.1016/j.cell.2010.04.007>

40 Rocks, O., Peyker, A., Kahms, M., Verveer, P. J., Koerner, C., Lumbierres, M., et al.  
41 (2005). An acylation cycle regulates localization and activity of palmitoylated Ras  
42 isoforms. *Science (New York, N.Y.)*, 307(5716), 1746–1752.  
43 <http://doi.org/10.1126/science.1105654>

44 Ryckaert, J.-P., Ciccotti, G., & Berendsen, H. J. C. (1977). Numerical Integration of the  
45 Cartesian Equations of Motion of a System with Constraints: Molecular Dynamics of  
46 n-Alkanes. *J. of Comp. Phys.*, 1–15.

- 1 Savidis, G., Perreira, J. M., Portmann, J. M., Meraner, P., Guo, Z., Green, S., & Brass,  
2 A. L. (2016). The IFITMs Inhibit Zika Virus Replication. *CellReports*, *15*(11), 2323–  
3 2330. <http://doi.org/10.1016/j.celrep.2016.05.074>
- 4 Schoggins, J. W., Wilson, S. J., Panis, M., Murphy, M. Y., Jones, C. T., Bieniasz, P., &  
5 Rice, C. M. (2011). A diverse range of gene products are effectors of the type I  
6 interferon antiviral response. *Nature*, *472*(7344), 481–485.  
7 <http://doi.org/10.1038/nature09907>
- 8 Selvaraj, R., & Fox, J. M. (2013). trans-Cyclooctene — a stable, voracious dienophile  
9 for bioorthogonal labeling. *Current Opinion in Chemical Biology*, *17*(5), 753–760.  
10 <http://doi.org/10.1016/j.cbpa.2013.07.031>
- 11 Shen, Y., Delaglio, F., Cornilescu, G., & Bax, A. (2009). TALOS+: a hybrid method for  
12 predicting protein backbone torsion angles from NMR chemical shifts. *Journal of*  
13 *Biomolecular NMR*, *44*(4), 213–223. <http://doi.org/10.1007/s10858-009-9333-z>
- 14 Shi, G., Kenney, A. D., Kudryashova, E., Zhang, L., Hall-Stoodley, L., Robinson, R. T.,  
15 et al. (2020). Opposing activities of IFITM proteins in SARS-CoV-2 infection.  
16 *BioRxiv*, *1866*, 382–28. <http://doi.org/10.1101/2020.08.11.246678>
- 17 Spence, J. S., He, R., Hoffmann, H.-H., Das, T., Thinon, E., Rice, C. M., et al. (2019).  
18 IFITM3 directly engages and shuttles incoming virus particles to lysosomes. *Nature*  
19 *Chemical Biology*, 1–15. <http://doi.org/10.1038/s41589-018-0213-2>
- 20 Steinbach, P. J., & Brooks, B. R. (1994). New spherical-cutoff methods for long-range  
21 forces in macromolecular simulation. *Journal of Computational Chemistry*, *15*(7),  
22 667–683. <http://doi.org/10.1002/jcc.540150702>
- 23 Suddala, K. C., Lee, C. C., Meraner, P., Marin, M., Markosyan, R. M., Desai, T. M., et  
24 al. (2019). Interferon-induced transmembrane protein 3 blocks fusion of sensitive  
25 but not resistant viruses by partitioning into virus-carrying endosomes. *PLoS*  
26 *Pathogens*, *15*(1), e1007532–35. <http://doi.org/10.1371/journal.ppat.1007532>
- 27 Sun, X., Zeng, H., Kumar, A., Belser, J. A., Maines, T. R., & Tumpey, T. M. (2016).  
28 Constitutively Expressed IFITM3 Protein in Human Endothelial Cells Poses an Early  
29 Infection Block to Human Influenza Viruses. *Journal of Virology*, *90*(24), 11157–  
30 11167. <http://doi.org/10.1128/JVI.01254-16>
- 31 Šečkutė, J., & Devaraj, N. K. (2013). Expanding room for tetrazine ligations in the in  
32 vivo chemistry toolbox. *Current Opinion in Chemical Biology*, *17*(5), 761–767.  
33 <http://doi.org/10.1016/j.cbpa.2013.08.004>
- 34 Venable, R. M., Sodt, A. J., Rogaski, B., Rui, H., Hatcher, E., MacKerell, A. D., Jr, et al.  
35 (2014). CHARMM All-Atom Additive Force Field for Sphingomyelin: Elucidation of  
36 Hydrogen Bonding and of Positive Curvature. *Biophysj*, *107*(1), 134–145.  
37 <http://doi.org/10.1016/j.bpj.2014.05.034>
- 38 Wakim, L. M., Gupta, N., Mintern, J. D., & Villadangos, J. A. (2013). Enhanced survival  
39 of lung tissue-resident memory CD8+ T cells during infection with influenza virus  
40 due to selective expression of IFITM3. *Nature Immunology*, *14*(3), 238–245.  
41 <http://doi.org/10.1038/ni.2525>
- 42 Wakim, L. M., Woodward-Davis, A., Liu, R., Hu, Y., Villadangos, J., Smyth, G., & Bevan,  
43 M. J. (2012). The Molecular Signature of Tissue Resident Memory CD8 T Cells  
44 Isolated from the Brain. *Journal of Immunology (Baltimore, Md. : 1950)*, *189*(7),  
45 3462–3471. <http://doi.org/10.4049/jimmunol.1201305>
- 46 Weston, S., Czieso, S., White, I. J., Smith, S. E., Kellam, P., & Marsh, M. (2014). A

1 Membrane Topology Model for Human Interferon Inducible Transmembrane Protein  
2 1. *PLoS ONE*, 9(8), e104341–11. <http://doi.org/10.1371/journal.pone.0104341>  
3 Williamson, M. P. (2013). Using chemical shift perturbation to characterise ligand  
4 binding. *Progress in Nuclear Magnetic Resonance Spectroscopy*, 73(C), 1–16.  
5 <http://doi.org/10.1016/j.pnmrs.2013.02.001>  
6 Wu, Emilia L, Cheng, X., Jo, S., Rui, H., Song, K. C., Dávila-Contreras, E. M., et al.  
7 (2014). CHARMM-GUI Membrane Buildertoward realistic biological membrane  
8 simulations. *Journal of Computational Chemistry*, 35(27), 1997–2004.  
9 <http://doi.org/10.1002/jcc.23702>  
10 Wu, Xianfang, Thi, V. L. D., Huang, Y., Billerbeck, E., Saha, D., Hoffmann, H.-H., et al.  
11 (2018). Intrinsic Immunity Shapes Viral Resistance of Stem Cells. *Cell*, 172(3), 423–  
12 424.e25. <http://doi.org/10.1016/j.cell.2017.11.018>  
13 Wu, Xiaojun, Spence, J. S., Das, T., Yuan, X., Chen, C., Zhang, Y., et al. (2020). Site-  
14 Specific Photo-Crosslinking Proteomics Reveal Regulation of IFITM3 Trafficking and  
15 Turnover by VCP/p97 ATPase. *Cell Chemical Biology*, 27(5), 571–585.e6.  
16 <http://doi.org/10.1016/j.chembiol.2020.03.004>  
17 Yang, X., Kovalenko, O. V., Tang, W., Claas, C., Stipp, C. S., & Hemler, M. E. (2004).  
18 Palmitoylation supports assembly and function of integrin–tetraspanin complexes.  
19 *The Journal of Cell Biology*, 167(6), 1231–1240.  
20 <http://doi.org/10.1083/jcb.200404100>  
21 Yáñez, D. C., Sahni, H., Ross, S., Solanki, A., Lau, C.-I., Papaioannou, E., et al. (2018).  
22 IFITM proteins drive type 2 T helper cell differentiation and exacerbate allergic  
23 airway inflammation. *European Journal of Immunology*, 49(1), 66–78.  
24 <http://doi.org/10.1002/eji.201847692>  
25 Yount, J. S., Karssemeijer, R. A., & Hang, H. C. (2012). S-palmitoylation and  
26 ubiquitination differentially regulate interferon-induced transmembrane protein 3  
27 (IFITM3)-mediated resistance to influenza virus. *The Journal of Biological*  
28 *Chemistry*, 287(23), 19631–19641. <http://doi.org/10.1074/jbc.M112.362095>  
29 Yount, J. S., Moltedo, B., Yang, Y.-Y., Charron, G. C., Moran, T. M., pez, C. B. L. O., &  
30 Hang, H. C. (2010). Palmitoylome profiling reveals S-  
31 palmitoylation&ndash;dependent antiviral activity of IFITM3. *Nature Chemical*  
32 *Biology*, 6(8), 610–614. <http://doi.org/10.1038/nchembio.405>  
33 Zang, R., Case, J. B., Gomez Castro, M. F., Liu, Z., Zeng, Q., Zhao, H., et al. (2020).  
34 Cholesterol 25-hydroxylase suppresses SARS-CoV-2 replication by blocking  
35 membrane fusion. *BioRxiv*, 30, 555–36. <http://doi.org/10.1101/2020.06.08.141077>  
36 Zani, A., Zhang, L., McMichael, T. M., Kenney, A. D., Chemudupati, M., Kwiek, J. J., et  
37 al. (2019). Interferon-induced transmembrane proteins inhibit cell fusion mediated  
38 by trophoblast syncytins. *The Journal of Biological Chemistry*, 294(52), 19844–  
39 19851. <http://doi.org/10.1074/jbc.AC119.010611>  
40 Zevian, S., Winterwood, N. E., & Stipp, C. S. (2011). Structure-Function Analysis of  
41 Tetraspanin CD151 Reveals Distinct Requirements for Tumor Cell Behaviors  
42 Mediated by  $\alpha 3\beta 1$  versus  $\alpha 6\beta 4$  Integrin. *The Journal of Biological Chemistry*, 286(9),  
43 7496–7506. <http://doi.org/10.1074/jbc.M110.173583>  
44 Zhang, X., Tan, Y., Ling, Y., Lu, G., Liu, F., Yi, Z., et al. (2020a). Viral and host factors  
45 related to the clinical outcome of COVID-19. *Nature*, 1–18.  
46 <http://doi.org/10.1038/s41586-020-2355-0>

- 1 Zhang, Y., Qin, L., Zhao, Y., Zhang, P., Xu, B., Li, K., et al. (2020b). Interferon-Induced  
2 Transmembrane Protein 3 Genetic Variant rs12252-C Associated With Disease  
3 Severity in Coronavirus Disease 2019. *The Journal of Infectious Diseases*, 222(1),  
4 34–37. <http://doi.org/10.1093/infdis/jiaa224>
- 5 Zhang, Y.-H., Zhao, Y., Li, N., Peng, Y.-C., Giannoulatou, E., Jin, R.-H., et al. (2013).  
6 Interferon-induced transmembrane protein-3 genetic variant rs12252-C is  
7 associated with severe influenza in Chinese individuals. *Nature Communications*,  
8 4(1), 1243–6. <http://doi.org/10.1038/ncomms2433>
- 9 Zhao, X., Guo, F., Liu, F., Cuconati, A., Chang, J., Block, T. M., & Guo, J.-T. (2014).  
10 Interferon induction of IFITM proteins promotes infection by human coronavirus  
11 OC43. *Proceedings of the National Academy of Sciences of the United States of*  
12 *America*, 111(18), 6756–6761. <http://doi.org/10.1073/pnas.1320856111>
- 13 Zhao, X., Sehgal, M., Hou, Z., Cheng, J., Shu, S., Wu, S., et al. (2018). Identification of  
14 Residues Controlling Restriction versus Enhancing Activities of IFITM Proteins on  
15 Entry of Human Coronaviruses. *Journal of Virology*, 92(6), 374–17.  
16 <http://doi.org/10.1128/JVI.01535-17>
- 17 Zheng, M., Zhao, X., Zheng, S., Chen, D., Du, P., Li, X., et al. (2020). Bat SARS-Like  
18 WIV1 coronavirus uses the ACE2 of multiple animal species as receptor and evades  
19 IFITM3 restriction viaTMPRSS2 activation of membrane fusion. *Emerging Microbes*  
20 *& Infections*, 9(1), 1567–1579. <http://doi.org/10.1080/22221751.2020.1787797>
- 21
